## RHYTHMIC PATTERNS IN THE THORACIC NERVE CORD OF THE STICK INSECT INDUCED BY PILOCARPINE

ANSGAR BÜSCHGES<sup>1</sup>, JOSEF SCHMITZ<sup>2</sup> AND ULRICH BÄSSLER<sup>1</sup>

<sup>1</sup>Fachbereich Biologie, Universität Kaiserslautern, PO Box 3049, 67653 Kaiserslautern, Germany and

<sup>2</sup>Fachbereich Biologie, Universität Bielefeld, PO Box 100131, 33501 Bielefeld, Germany

Accepted 22 September 1994

### Summary

Bath application of the muscarinic agonist pilocarpine onto the deafferented stick insect thoracic nerve cord induced long-lasting rhythmic activity in leg motoneurons. Rhythmicity was induced at concentrations as low as  $1 \times 10^{-4} \text{ mol l}^{-1}$  pilocarpine. The most stable rhythms were reliably elicited at concentrations from  $2 \times 10^{-3} \text{ mol l}^{-1}$  to  $5 \times 10^{-3} \text{ mol l}^{-1}$ . Rhythmicity could be completely abolished by application of atropine. The rhythm in antagonistic motoneurone pools of the three proximal leg joints, the subcoxal, the coxo-trochanteral (CT) and the femoro-tibial (FT), was strictly alternating. In the subcoxal motoneurons, the rhythm was characterised by the retractor burst duration being correlated with cycle period, whereas the protractor burst duration was almost independent of it. The cycle periods of the rhythms in the subcoxal and CT motoneurone pools were in a similar range for a given preparation. In contrast, the rhythm exhibited by motoneurons supplying the FT joint often had about half the duration. The pilocarpine-induced rhythm was generated independently in each hemiganglion. There was no strict intersegmental coupling, although the protractor motoneurone pools of the three thoracic ganglia tended to be active in phase.

There was no stereotyped cycle-to-cycle coupling in the activities of the motoneurone pools of the subcoxal joint, the CT joint and the FT joint in an isolated mesothoracic ganglion. However, three distinct 'spontaneous, recurrent patterns' (SRPs) of motoneuronal activity were reliably

generated. Within each pattern, there was strong coupling of the activity of the motoneurone pools. The SRPs resembled the motor output during step-phase transitions in walking: for example, the most often generated SRP (SRP1) was exclusively exhibited coincident with a burst of the fast depressor trochanteris motoneurone. During this burst, there was a switch from subcoxal protractor to retractor activity after a constant latency. The activity of the FT joint extensor motoneurons was strongly decreased during SRP1. SRP1 thus qualitatively resembled the motoneuronal activity during the transition from swing to stance of the middle legs in forward walking. Hence, we refer to SRPs as 'fictive step-phase transitions'.

In intact, restrained animals, application of pilocarpine also induced alternating activity in antagonistic motoneurone pools supplying the proximal leg joints. However, there were marked differences from the deafferented preparation. For example, SRP1 was not generated in the latter situation. However, if the ipsilateral main leg nerve was cut, SRP1s reliably occurred. Our results on the rhythmicity in leg motoneurone pools of deafferented preparations demonstrate central coupling in the activity of the leg motoneurons that might be incorporated into the generation of locomotion *in vivo*.

Key words: rhythm generation, walking, central pattern generator, joint coordination, muscarinic agonists, step-phase transition, invertebrate acetylcholine receptor, *Carausius morosus*, stick insect.

### Introduction

The neural basis of rhythmic movements has been studied extensively in a variety of systems. It is now generally accepted that rhythmic motor activity used for locomotion is generated by an integration of central and peripheral (sensory) mechanisms. Emphasis has sometimes been placed on the peripheral influences (e.g. Bässler, 1988; Sherrington, 1913) and sometimes on the central influences (e.g. Delcomyn, 1980; von Holst, 1939; Selverston *et al.* 1976; Wilson, 1961; see also Grillner, 1985). Although peripheral influences are well known

for most systems, investigations have, for practical reasons, usually focused primarily on the generation of rhythmic motor activity by central pattern generators (CPGs). A CPG can be studied in an isolated part of the nervous system, whereas the investigation of a peripheral influence requires at least a semi-intact preparation. Isolated parts of some central nervous systems (CNS), either *in vivo* or *in vitro*, can produce a motor output, spontaneously or under the influence of certain drugs. In some systems, this motor output is similar to the motor

output during a particular rhythmic movement and can therefore be considered as the output of a CPG (e.g. cat walking, Grillner and Zangger, 1984; crayfish swimmeret system, Ikeda and Wiersma, 1964; lamprey swimming, Grillner, 1985; leech swimming, Kristan and Weeks, 1983; leech heartbeat, Calabrese and Arbas, 1989; Thompson and Stent, 1976; locust flight, Pearson and Ramirez, 1992; Robertson and Pearson, 1985; Stevenson and Kutsch, 1987; Wilson, 1961; mollusc swimming, Arshavsky *et al.* 1993; stomatogastric system, Harris-Warrick *et al.* 1992; Selverston and Moulins, 1987; *Tritonia* swimming, Getting, 1989; *Xenopus* embryo swimming, Arshavsky *et al.* 1993). In motor systems underlying locomotion, such motor output is called 'fictive locomotion'.

Neuronal mechanisms underlying the generation of fictive locomotion can only be considered to be the mechanisms underlying the generation of real locomotion if two requirements are met. (1) The role that the CPG plays in the isolated CNS must not differ from its role in the intact animal (Bässler, 1986; Pearson, 1987). This requirement can only be tested when at least some features of pattern generation in the intact animal are known. (2) The fictive locomotion must show at least the basic characteristics of the motor output of the intact system. Interpretation of this requirement depends greatly upon the depth of knowledge about the intact motor output and on the theoretical standpoint of the investigator.

Until recently, fictive locomotory patterns were unknown in arthropod walking systems. This led to the conclusion that CPGs for walking do not exist in arthropods (Bässler and Wegner, 1983; Pearson, 1985, 1987). It has recently been shown in both the crayfish (Chrachri and Clarac, 1990) and the locust (Ryckebusch and Laurent, 1993) that muscarinic agonists, e.g. pilocarpine, induce 'walking-like' rhythms in leg motoneurons of isolated thoracic ganglia. Because of similarities between these rhythms and the motor outputs during walking, the evoked activity was called 'fictive locomotion'. These results seem to contradict earlier findings on the stick insect.

In the stick insect, the movements of the legs (Bässler, 1993; Graham, 1985; Wendler, 1964), the torques generated at single leg joints (Cruse, 1976) and the motor output of the different motoneuronal pools have been described in great detail (e.g. Büschges *et al.* 1994; Epstein and Graham, 1983; Graham and Epstein, 1985; Graham and Wendler, 1981a; Schmitz and Haßfeld, 1989). All these elements depend greatly upon the walking situation (e.g. Cruse *et al.* 1993; Foth and Graham, 1983a,b; Graham and Wendler, 1981a; Schmitz, 1993; for reviews, see Bässler, 1983; Graham, 1985). Much is also known about the sensory influences on the generation of the motor output of the walking stick insect (for reviews, see Bässler, 1983; Cruse, 1990; Graham, 1985). There is no evidence for a CPG in the thoracic ganglia that, by itself, produces a coordinated motor pattern for walking. The proper coordination of several joints requires sensory feedback (Bässler and Wegner, 1983; Bässler, 1993). Present evidence suggests that the neural network that produces the motor

activity underlying walking in the stick insect is a modular system composed of both peripheral and central elements (Bässler, 1993). Neither peripheral nor central elements alone can generate coordinated motor output. Only an interactive cooperation of these modules is able to generate an appropriate motor pattern (Bässler, 1993; Bässler and Nothof, 1991). Nonspiking interneurons underlying sensory-motor pathways within the walking system appear to be part of these modules, organising the motor output of leg joints in the standing as well as in the walking animal (Bässler and Büschges, 1990; Büschges, 1990; Büschges *et al.* 1994; Schmitz *et al.* 1991).

In the light of these results, we set out to investigate the effect of pilocarpine on the thoracic nervous system of the stick insect. Because so many details of the walking motor output are known and because some basic principles of pattern generation are also known (e.g. the modular organisation), it should be possible to test the above requirements of fictive locomotion for the stick insect. We mainly focused on rhythms in the middle leg motoneurons supplying the three main leg joints, i.e. the subcoxal joint, the coxa-trochanter (CT) joint and the femur-tibia (FT) joint.

We show that pilocarpine induces long-lasting alternating rhythmicity in the antagonistic motoneurone pools supplying the three proximal leg joints in isolated and in partially deafferented thoracic ganglia. In the stick insect, pilocarpine does not induce a motor pattern that could be termed 'fictive locomotion', as we did not observe a cycle-to-cycle coupling between the rhythms in the motoneurone pools supplying the different leg joints. Nevertheless, pilocarpine reliably induces distinct patterns of coupled motor activity in leg motoneurone pools. These patterns are termed 'fictive step-phase transitions'.

### Materials and methods

Experiments were performed on adult female stick insects of the species *Carausius morosus* (Br.) taken from laboratory cultures at the Universities of Kaiserslautern and Bielefeld. All experiments were carried out under daylight conditions at room temperature (20–22 °C). The data presented were gathered from 124 experiments.

#### Preparation

Prior to experiments on the thoracic nerve cord, all legs of the stick insect were amputated at the femur, distal to the trochanteral autotomy point. The animals were then mounted dorsal side up on a foam platform using dental cement. A cut was made along the dorsal midline of the pro-, meso- and metathoracic segments and along the first three abdominal segments. The thorax was opened by bending both tergal halves away from each other to the right and to the left. This procedure moved the coxae of the legs ventrally into cavities of the platform. The left and the right parts of the tergum were fixed with minuten pins onto the foam platform so that the thorax formed a 'bathtub'. Ventilation of the nervous system was maintained through the trachea that remained intact. The

gut was removed. The following lateral nerves (labelled according to Marquardt, 1940) were cut close to the thoracic ganglia: nervus anterior ( $n_a$ ); nervus posterior ( $n_p$ ), nervus uniparis ( $n_{up}$ ). All other lateral leg nerves; nervus lateralis 2–5 ( $n_{l2}$ – $n_{l5}$ ) and nervus cruris ( $n_{cr}$ ) were cut as well, after positioning an extracellular hook electrode on some of them. In preparations using the isolated mesothoracic ganglion, both anterior and posterior connectives of the mesothoracic ganglion were cut. In preparations concerning the action of pilocarpine on the thoracic nerve cord, the connectives between the prothoracic ganglion and the suboesophageal ganglion were cut (see text). Stick insect saline (Weidler and Diecke, 1969) was then applied dropwise into the body cavity. This preparation remained healthy for at least 120 min, and often up to 180 min. In the experiments on intact, but restrained, animals all legs and leg nerves were left intact. In some experiments, the leg nerves were then severed during the experiments (see Fig. 14 and text).

Stock solutions of  $10^{-2} \text{ mol l}^{-1}$  pilocarpine and atropine sulphate (Sigma) in saline were prepared in advance and diluted with saline to their final concentrations prior to application. Application of the drugs was performed by removing the saline from the thorax of the experimental animal and replacing it with the drug solution under investigation at a final concentration of  $10^{-5}$  to  $10^{-2} \text{ mol l}^{-1}$ .

#### Electrophysiology

Activity of the protractor coxae, retractor coxae, levator trochanteris, depressor trochanteris and extensor tibiae motoneurons was monitored in the appropriate leg nerves by using extracellular hook electrodes (Schmitz *et al.* 1988). The identification of motoneurons in recordings from the lateral nerves was, in all cases, unambiguous, as the recorded nerves either carried only axons of the motoneurons under investigation (e.g. C1, C2, innervating the muscles of the CT joint, see below), or the axons of the motoneurons that were being investigated had the largest diameter and so produced the biggest spikes in the nerve recording (retractor motoneurons in  $n_{l5}$ ; protractor motoneurons in  $n_{l2}$ , Graham and Wendler, 1981b; FETi, SETi in  $n_{l3}$ ; for the relationship between motor axon diameter and extracellularly recorded action potential amplitude, see Pearson *et al.* 1970). In several experiments, intracellular recordings were obtained from neuropilar processes of certain motoneurons in the mesothoracic ganglion. To do this, the ganglion was placed on a wax-coated platform and treated according to established procedures (Büschges, 1989). Intracellular recordings were performed using thin-walled glass microelectrodes with resistances of 40–60 M $\Omega$  when the tips were filled with 5% Lucifer Yellow and the shanks were filled with  $1 \text{ mol l}^{-1}$  LiCl. The motoneurons were identified either by their extracellularly recorded spikes or by their morphology (Graham and Wendler, 1981a,b; Storrer *et al.* 1986). Morphology was determined by staining the neurones with Lucifer Yellow according to established procedures. All data were stored either on a seven-channel FM recorder (Racal

Store 7) or on an eight-channel digital audio tape recorder (Biologic, DTR 1800 or 1802).

#### Nomenclature

Motor nerves were named according to Bässler (1983), Graham and Wendler (1981b) and Marquardt (1940). The following abbreviations are used in the present paper: CI1, common inhibitor 1 motoneurone; C1, nervus C1, innervating the levator trochanteris muscle; C2, nervus C2, innervating the depressor trochanteris muscle; FDTr, fast depressor trochanteris motoneurone; FETi, fast extensor tibiae motoneurone;  $n_{l2}$ , nervus lateralis 2, carrying the protractor coxae motoneurons;  $n_{l3}$ , nervus lateralis 3, carrying the extensor tibiae motoneurons;  $n_{l5}$ , nervus lateralis 5, carrying the retractor coxae motoneurons; SDTr, slow depressor trochanteris motoneurone; SETi, slow extensor tibiae motoneurone.

#### Data analysis

The data were either displayed on a Gould ES1000 chart recorder or analysed off-line. Analog-to-digital conversion was performed by using either a DT 2821/f 16 SE AD/DA card and the program Turbolab V4.0 (Stemmer) or a CED 1401plus (Cambridge Electronic Co.). Further analysis was performed with the program Spike2 (Cambridge Electronic Co.). This program was used to create phase histograms of the recorded motoneuronal activity.

Pilocarpine-induced activity of the motoneurone pools consisted of bursts of spikes. Fast motoneurons have bigger axon diameters in the motor nerves than do slow motoneurons. Fast and slow motoneurons could therefore be reliably distinguished by their different extracellular spike amplitudes (Bässler, 1983; Graham and Wendler, 1981b; Schmitz, 1986; see also Pearson *et al.* 1970). The onset and the offset of a burst of activity in the excitatory motoneurone pools were usually clearly defined by their abruptness. Usually the slow and the fast motoneurons of a motor nerve exhibited clear bursting activity. In a few cases, one or two slow motoneurons (from the retractor and the protractor coxae nerve or the levator trochanteris nerve) showed weakly modulated activity that was tonically increased during pilocarpine application. The only motoneurone that was regularly found not to show bursts, but instead had increased tonic and modulated activity following pilocarpine application, was the common inhibitor 1 (CI1). All cycles of rhythmicity of each motor nerve of an evaluated animal were used to calculate mean values. Circular statistics (see Fig. 9) were performed according to Batschelet (1965); beside the mean vector length ( $r$ ), the test variable  $z=nr^2$  was calculated for testing significance by means of the Rayleigh test.

#### Results

##### *Pilocarpine-induced rhythms in the subcoxal joint motoneurons of the isolated mesothoracic ganglion*

Recordings from nerves that contain the axons of

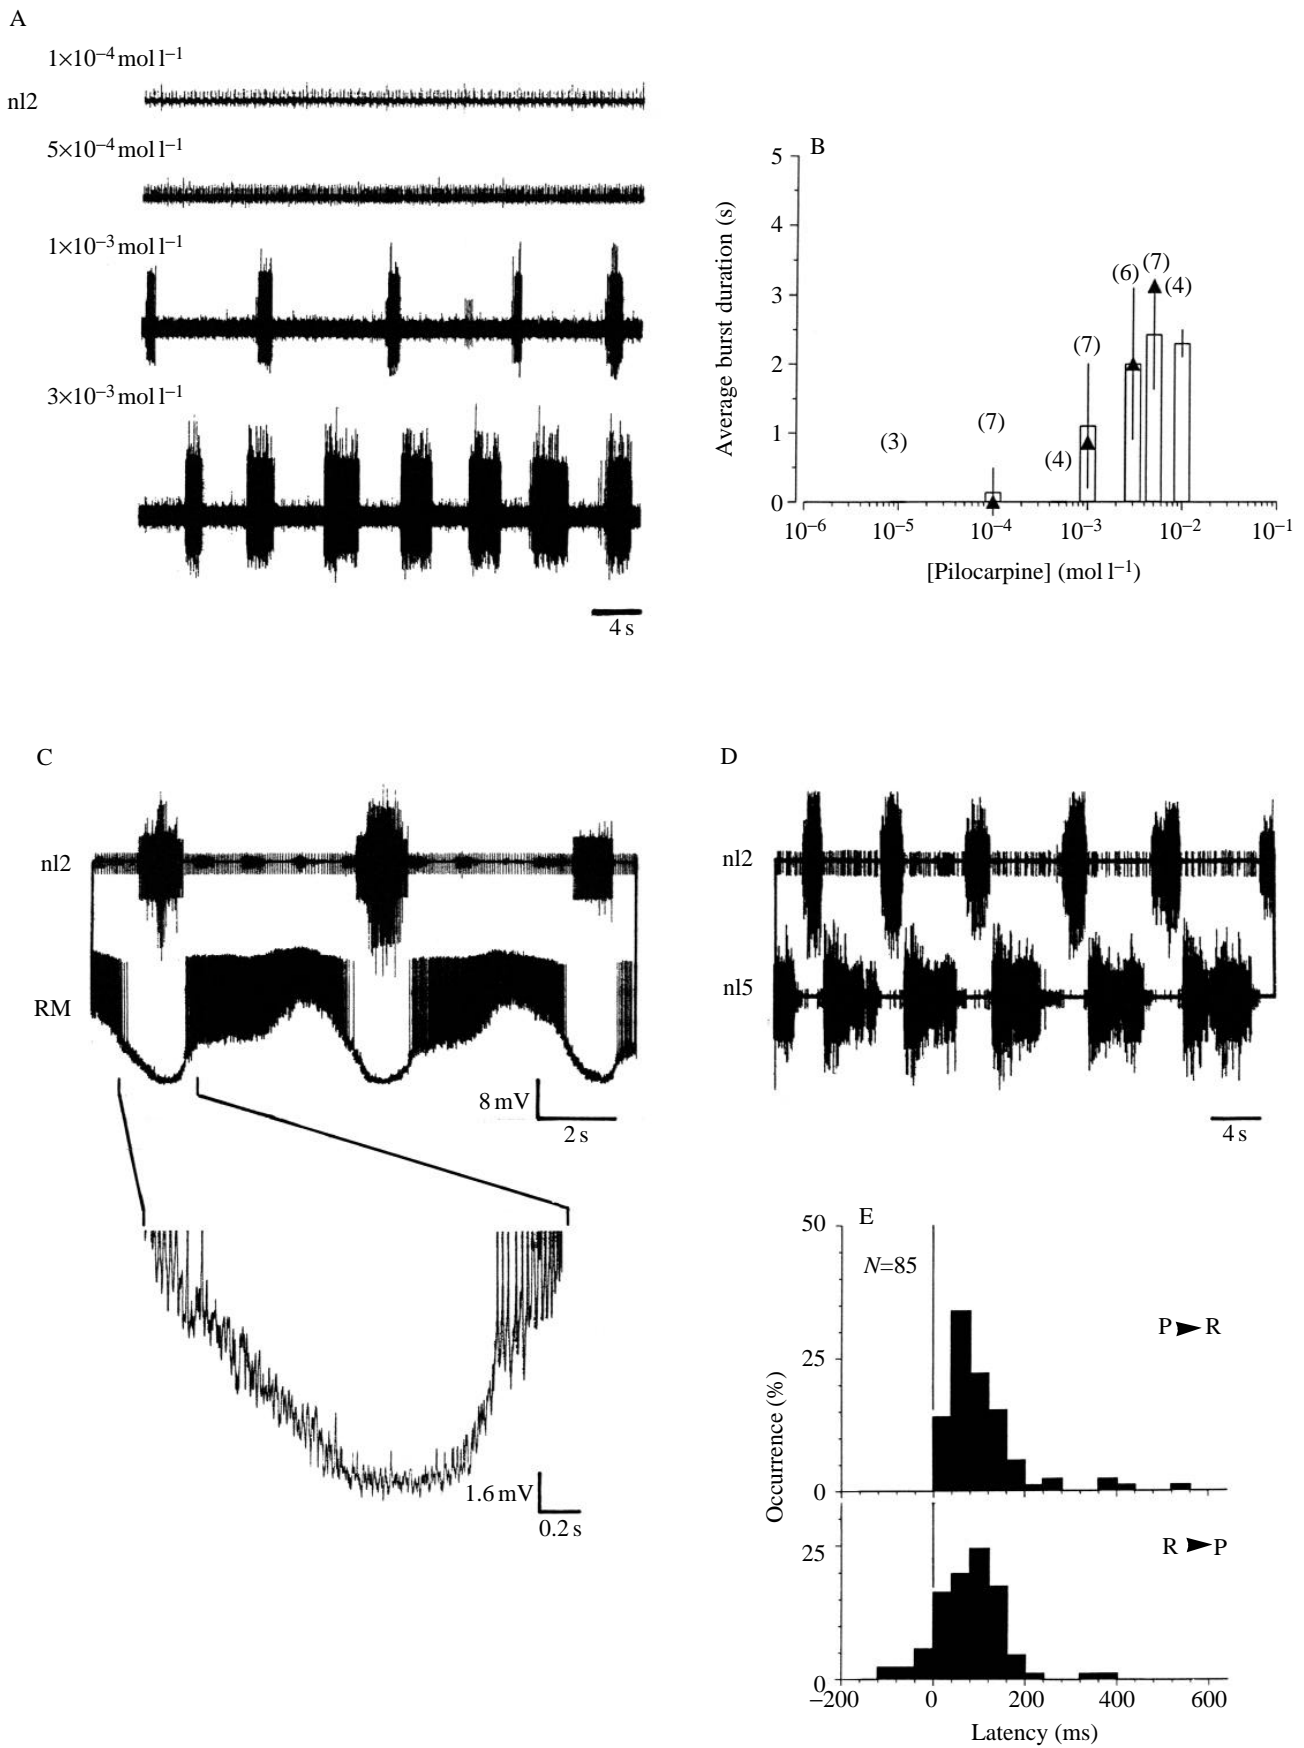

Fig. 1

Fig. 1. Pilocarpine-induced rhythmicity in motoneurons of the subcoxal joint in isolated mesothoracic ganglia. (A) Recordings from the protractor nerve nl2 during bath application of pilocarpine of increasing concentration in one preparation. (B) Dependence of the average protractor burst duration on pilocarpine concentration. Values are means  $\pm$  s.d. Data are from seven different preparations. Triangles denote the average protractor burst durations from a single preparation. Numbers in parentheses give the number of preparations tested at each concentration. (C) Alternating rhythms in excitatory protractor coxae motoneurons (nl2, extracellular record) and an intracellularly recorded retractor coxae motoneurone (RM) following bath application of pilocarpine. At the bottom, the end of one retractor motoneurone burst and the beginning of the next are shown on an expanded time scale (see text). The continuously firing small unit in the nl2 record is CI1 (see Fig. 8). (D) Alternating rhythmicity in the excitatory protractor coxae (nl2) and retractor coxae (nl5) motoneurone pools following bath application of  $5 \times 10^{-3} \text{ mol l}^{-1}$  pilocarpine. (E) Latency between the bursts of slow motoneurons. Data are pooled from three different preparations. P $\rightarrow$ R, latency between the end of protractor burst activity and the beginning of retractor burst activity; R $\rightarrow$ P, latency between the end of retractor burst activity and the beginning of protractor burst activity.

motoneurons innervating the leg muscles in an isolated mesothoracic ganglion (i.e. all connectives cut) revealed weak tonic activity in some axons that produced very small action potentials in the extracellular recordings. When pilocarpine was applied at various concentrations onto the isolated mesothoracic ganglion, changes occurred in the activity of the recorded motoneurone pools. This is shown in Fig. 1 for the activity of the motoneurons of the protractor

coxae muscle recorded in nerve nl2 (Graham and Wendler, 1981b). At a concentration of  $5 \times 10^{-4} \text{ mol l}^{-1}$  pilocarpine, tonic activity was increased in some small units in this preparation (Fig. 1A). At concentrations of  $1 \times 10^{-3} \text{ mol l}^{-1}$  and greater, pilocarpine induced clearly defined bursts of activity in the slow and fast motoneurons in the protractor nerve (Fig. 1A). CI1 also fired, but its modulation was different from the modulation of the excitatory motoneurons (see below). The threshold concentration for the induction of rhythmicity in the excitatory motoneurone pool was different in each preparation, ranging from  $1 \times 10^{-4} \text{ mol l}^{-1}$  to  $2 \times 10^{-3} \text{ mol l}^{-1}$  pilocarpine. During pilocarpine-induced activity, the burst duration of the excitatory protractor motoneurons varied somewhat within each animal as well as among animals. At  $1 \times 10^{-3} \text{ mol l}^{-1}$  pilocarpine, the burst duration in one preparation ranged from 0.4 to 2.7 s ( $0.9 \pm 0.4$  s; mean  $\pm$  s.d.,  $N=31$ ). For different animals, the average burst duration in  $1 \times 10^{-3} \text{ mol l}^{-1}$  pilocarpine solution ranged from 0.9 to 2.4 s (five animals, see Fig. 1B). In all cases, the mean burst duration in the excitatory protractor motoneurons increased with increasing concentrations of pilocarpine (Fig. 1A,B), reaching its maximum at concentrations of about  $5 \times 10^{-3} \text{ mol l}^{-1}$ .

The cycle period of protractor activity (defined as the time between the onsets of two successive protractor bursts) also depended to some extent on the concentration of pilocarpine, but it was much more variable. At low pilocarpine concentrations, cycle periods were longer than at higher concentrations; for example, in  $1 \times 10^{-4} \text{ mol l}^{-1}$  pilocarpine, cycle period was on average 17.9 s, and in  $3 \times 10^{-3} \text{ mol l}^{-1}$

Table 1. Temporal characteristics of rhythmicity in different animals treated with pilocarpine at concentrations from  $3 \times 10^{-3}$  to  $5 \times 10^{-3} \text{ mol l}^{-1}$

| Animal number | Number of cycles | Mean period (s) | Nerve | Slope  | Regression coefficient |
|---------------|------------------|-----------------|-------|--------|------------------------|
| 1             | 46               | $5.6 \pm 1.6$   | nl2   | 0.033  | 0.180                  |
|               |                  |                 | nl5   | 0.930  | 0.959                  |
| 2             | 32               | $9.6 \pm 4.3$   | nl2   | 0.174  | 0.506                  |
|               |                  |                 | nl5   | 0.750  | 0.944                  |
| 3             | 31               | $4.1 \pm 1.7$   | nl2   | 0.074  | 0.450                  |
|               |                  |                 | nl5   | 0.670  | 0.874                  |
| 4             | 36               | $7.8 \pm 1.6$   | nl2   | -0.038 | -0.199                 |
|               |                  |                 | nl5   | 0.997  | 0.938                  |
| 5             | 34               | $7.0 \pm 1.7$   | nl2   | -0.050 | -0.200                 |
|               |                  |                 | nl5   | 0.350  | 0.898                  |
| 6             | 40               | $5.8 \pm 3.4$   | nl2   | 0.096  | 0.230                  |
|               |                  |                 | nl5   | 0.880  | 0.911                  |
|               | 38               | $6.4 \pm 3.0$   | C1    | 0.400  | 0.643                  |
|               |                  |                 | C2    | 0.570  | 0.687                  |

Temporal characteristics of the pilocarpine-induced rhythmicity in the motoneurone pools of the stick insect mesothoracic ganglion (see also Fig. 2).

Number, number of experiment presented; Cycles, number of cycles evaluated; Mean period, average duration of the cycle period given with standard deviation; Nerve, nerve recorded from; Slope, slope of the regression line.

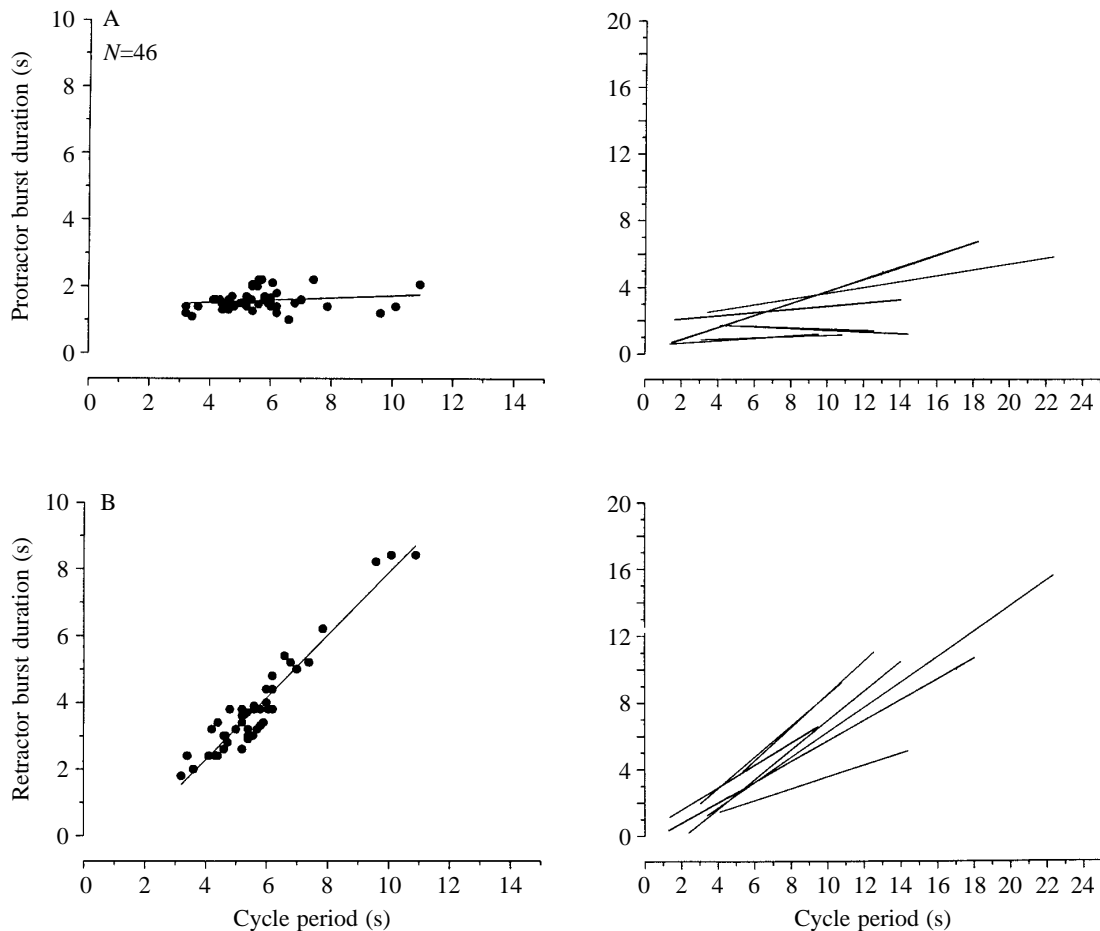

Fig. 2. Dependence of protractor (A) and retractor (B) burst duration on cycle period during rhythmic activity following application of  $3 \times 10^{-3}$  to  $5 \times 10^{-3} \text{ mol l}^{-1}$  pilocarpine. Left, data points and regression lines for a single experiment; right, regression lines from six other experiments. See also Table 1.

pilocarpine, average cycle periods ranged from 4.9 to 9.4 s in different preparations. The most regular and the longest lasting rhythmicity was found for pilocarpine concentrations in the range  $2 \times 10^{-3} \text{ mol l}^{-1}$  to  $5 \times 10^{-3} \text{ mol l}^{-1}$ . In this range, the protractor burst duration was on average  $2.4 \pm 0.9 \text{ s}$  ( $N=283$ , eight animals) and the average cycle period was  $6.4 \pm 1.5 \text{ s}$  ( $N=283$ ).

Simultaneous recordings of the activity of the excitatory retractor motoneurons in nerve n15 (Graham and Wendler, 1981b) and the protractor motoneurons in nerve n12 revealed that the retractor motoneurons were also rhythmically active following pilocarpine treatment. Application of pilocarpine induced an increase in the activity of the excitatory retractor motoneurons that led to bursting activity after a few seconds (5–30 s in different preparations). When rhythmicity was established, slow and fast retractor motoneurons displayed strong bursts of activity in antiphase with the activity of excitatory protractor motoneurons (Fig. 1C,D). This is particularly obvious from intracellular recordings of individual retractor motoneurons (Fig. 1C). The bursts of excitatory protractor and retractor motoneurons almost never overlapped

(Fig. 1C–E). In the few cases when overlapping burst activity was observed, it was restricted to a few spikes exhibited by slow motoneurons in the retractor nerve at the end of retractor activity and the beginning of protractor activity. We never found protractor and retractor bursts to overlap at the end of a protractor burst (Fig. 1D,E), and we did not find fast motoneurons in both motor nerves to be active at the same time. These observations indicate that these antagonistic motoneurone pools did not burst independently. At pilocarpine concentrations that induced the most regular rhythmic activity ( $2 \times 10^{-3}$  to  $5 \times 10^{-3} \text{ mol l}^{-1}$ ), retractor burst duration was on average  $3.7 \pm 1.3 \text{ s}$  ( $N=283$ , eight animals). At a given concentration of pilocarpine, the burst duration of the protractor motoneurons was independent of cycle period in most preparations (Fig. 2A; Table 1). In those few cases (numbers 2, 3 in Table 1) when there was a significant correlation between cycle period and protractor burst duration, the slopes were very close to zero. In contrast, retractor burst duration was always found to depend on cycle period (Fig. 2B; Table 1). This means that in the subcoxal motoneurone pools each individual cycle in pilocarpine-induced rhythms is

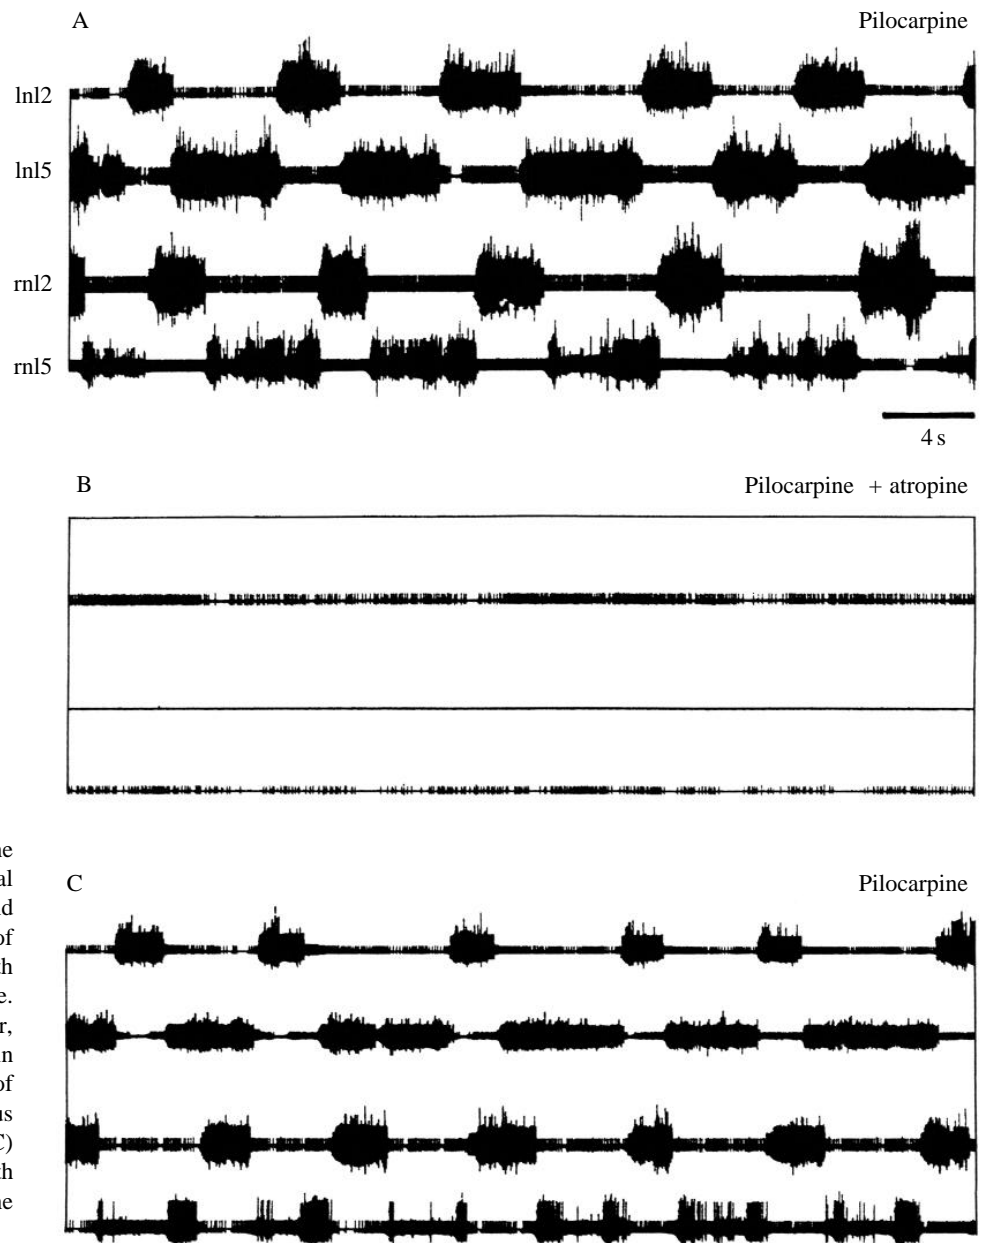

Fig. 3. Atropine blocks rhythms in the motoneurone pools supplying the subcoxal joint. (A) Rhythmicity in the protractor and retractor motoneurone pools of both sides of the mesothoracic ganglion following bath application of  $2 \times 10^{-3} \text{ mol l}^{-1}$  pilocarpine. nl2, protractor nerve; nl5, retractor nerve; r, right; l, left. (B) Rhythmicity ceased within 1 min following bath application of  $2 \times 10^{-3} \text{ mol l}^{-1}$  atropine plus  $2 \times 10^{-3} \text{ mol l}^{-1}$  pilocarpine. (C) Rhythmicity was re-established after bath application of pilocarpine alone ( $2 \times 10^{-3} \text{ mol l}^{-1}$ ).

composed of protractor bursts at rather constant duration and retractor bursts of changing duration, a characteristic that is typical for the tetrapod gait in stick insects (Graham, 1972, and see Discussion).

Addition of the muscarinic acetylcholine antagonist atropine at concentrations of  $2 \times 10^{-3} \text{ mol l}^{-1}$  to the pilocarpine solution ( $1 \times 10^{-3}$  to  $5 \times 10^{-3} \text{ mol l}^{-1}$ ) led to a cessation of the observed rhythm in the recorded motoneurone pools (Fig. 3A,B). After replacing the bath solution of pilocarpine and atropine with pilocarpine alone, rhythmicity was re-established (Fig. 3C).

*Each hemiganglion is able to produce the observed rhythm*

In most preparations (10 out of 11 preparations), both sides of the isolated mesothoracic ganglion exhibited rhythms

simultaneously (Figs 3 and 4). Only once (i.e. in less than 10% of all experiments) did rhythmic activity occur on only one side of the ganglion. In most cases of simultaneous rhythmicity on both sides, we found no strict cycle-to-cycle coupling between the opposite sides of the mesothoracic ganglion. In 7 out of 10 preparations, however, left and right excitatory protractor motoneurone pools tended to be active in phase (Fig. 4A,Bi). We never observed the two opposite excitatory protractor motoneurone pools showing rhythms in clear antiphase over several consecutive cycles.

Bisecting a mesothoracic hemiganglion along its midline using microscissors did not affect its ability to produce rhythms (Fig. 5;  $N=4$ ). We did not find major differences in the activity of the recorded motoneurons after the operation. The same was true for the rhythmicity that was induced by pilocarpine

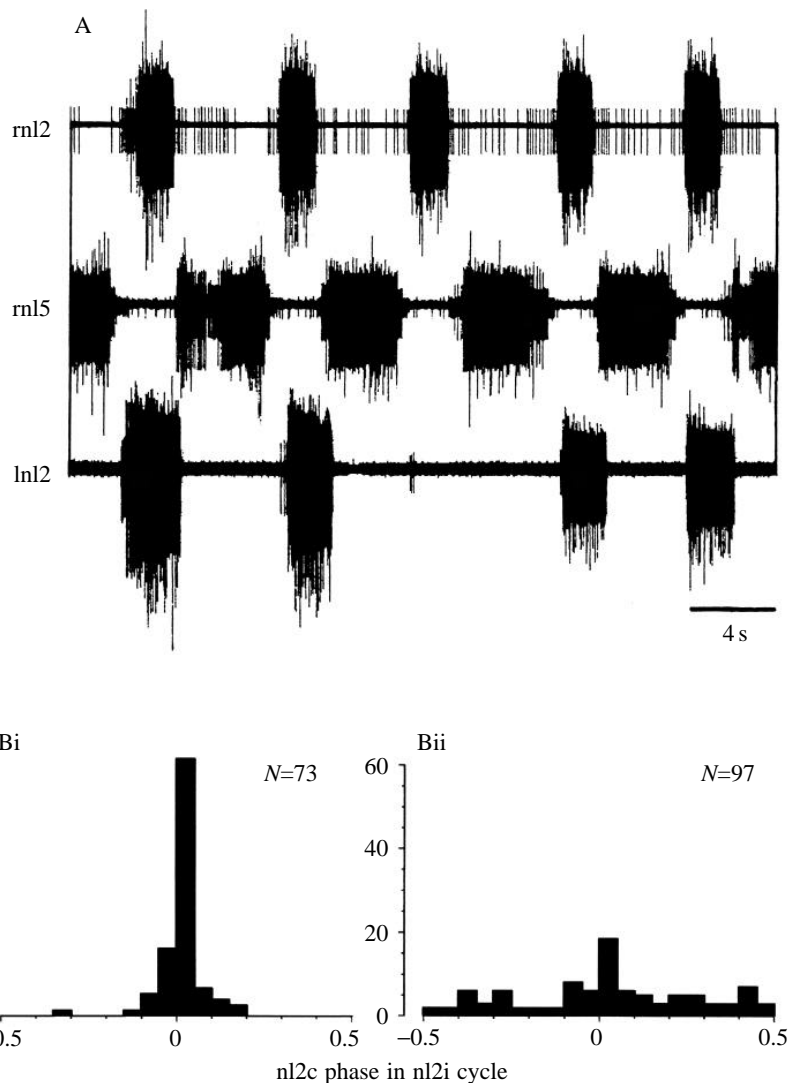

Fig. 4. Coupling between the rhythmic activity in the two mesothoracic hemiganglia. (A) Recordings of the rhythms in the motoneurons supplying the left (n12) and right (n12, n15) subcoxal joints. (Bi,ii) Phase histograms of the onset of activity of the contralateral protractor motoneurons (n12c) in the ipsilateral protractor motoneurone cycle (n12i) for two experiments (data for Bi derive from the experiment shown in A). *N* values refer to the number of cycles evaluated.

in the isolated prothoracic (not shown) and metathoracic ganglia (Fig. 5). Even in hemiganglia that had been cut prior to pilocarpine application, rhythmicity was established following pilocarpine application (not shown).

#### *Coupling of the rhythmic activity in the isolated thoracic nerve cord*

So far we have shown that pilocarpine application induced rhythms in both hemiganglia of each isolated thoracic ganglion. Application of pilocarpine onto a ventral nerve cord consisting of the deafferented pro-, meso- and metathoracic ganglia and the intact abdominal cord elicited rhythms in all thoracic ganglia in most of the preparations (9 out of 11; Fig. 6). In the remaining two experiments, rhythmicity was only observed in the meso- and metathoracic ganglia. The frequencies of the observed rhythms could be different in different ganglia. Nevertheless, in most cases, the excitatory protractor motoneurone pools of all three thoracic ganglia burst at similar frequencies (Fig. 6A). In general, it appeared that there was no stereotyped or fixed coupling between the rhythms in different ganglia, but in some preparations there

were long periods of in-phase activity in the excitatory protractor motoneurone pools of the three ganglia, ranging from 5 to 25 consecutive cycles (Fig. 6A). In each of the three ganglia in the preparation consisting of only the thoracic nerve cord, the burst duration of the protractor motoneurone pools was only weakly correlated with cycle period, as in the isolated mesothoracic ganglion. Retractor burst duration showed a strong dependence on the cycle period in the mesothoracic ganglion of this preparation (Fig. 6B).

#### *Pilocarpine-induced rhythms in the excitatory motoneurons of the coxa-trochanter and femur-tibia joints in the isolated ganglion*

Application of pilocarpine also induced alternating rhythmicity in the excitatory motoneurone pools innervating the muscles of the CT and FT joints. Fig. 7Ai shows a typical rhythm induced by  $3 \times 10^{-3} \text{ mol l}^{-1}$  pilocarpine in the excitatory levator trochanteris (nerve C1) and depressor trochanteris (nerve C2) motoneurons of the isolated mesothoracic ganglion. In nerve C1, some small units (in general 1–3 slow levator motoneurons; for a discussion of



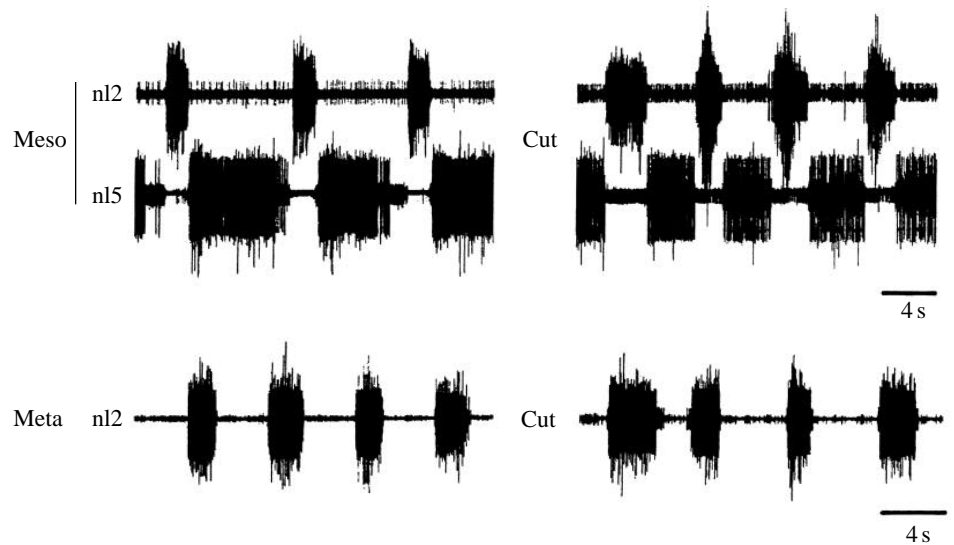

Fig. 5. Persistence of the rhythm in the isolated mesothoracic and metathoracic ganglia following a cut along the midline. Upper traces: rhythm in the isolated mesothoracic ganglion before and after the cut. nl2, protractor nerve; nl5, retractor nerve. Lower traces: rhythm in the isolated metathoracic ganglion before and after the cut.

the activity of CI1, see below) became tonically active following pilocarpine application, whereas all larger units (semi-fast and fast motoneurons) in the C1 nerve showed synchronised bursts of activity. The two excitatory depressor motoneurons (slow depressor trochanteris, SDTr; fast depressor trochanteris, FDTr) in nerve C2 also showed strong burst activity, which was in clear antiphase with the bursts of the levator motoneurons (Fig. 7A). However, the FDTr was not activated above its action potential threshold within each cycle of activity (see below). The burst durations of both levator and depressor trochanteris motoneurons depended on cycle period (Fig. 7Aii,iii; Table 1). The cycle period of the rhythm in the motoneuron pools supplying the CT joint was more variable than that in the motoneuron pools of the subcoxal joint. In most experiments, however, the average cycle periods of the motoneuron pools were in a similar range. For example, in the preparation shown in Fig. 6, the average cycle period of the retractor and protractor coxae motoneuron pools was  $7.4 \pm 2.2$  s ( $N=53$ ) and the average cycle period of the levator and depressor trochanteris motoneurons was  $6.9 \pm 4.6$  s ( $N=55$ ). The values for another animal are given in Table 1.

Pilocarpine application also induced rhythmicity in motoneurons supplying the FT joint. This is shown in Fig. 7Bi,ii for the effects of  $3 \times 10^{-3}$  mol l<sup>-1</sup> pilocarpine on the activity of the two excitatory extensor motoneurons, the SETi (slow extensor tibiae) and the FETi (fast extensor tibiae), recorded in nerve nl3. In general, the burst duration of the excitatory extensor motoneurons during the pilocarpine-induced rhythms depended on the cycle period (Fig. 7Biii). In most preparations, the cycle period of the observed rhythm in the excitatory extensor motoneurons was less than half the cycle period observed in the motoneuron pools of the other two leg joints. The average cycle period for SETi and FETi in a typical preparation ( $5 \times 10^{-3}$  mol l<sup>-1</sup> pilocarpine) was  $2.0 \pm 1.1$  s ( $N=51$ ), whereas it was  $4.2 \pm 2.9$  s ( $N=31$ ) for the motoneuron pools of the CT joint and  $5.1 \pm 3.7$  s ( $N=30$ ) for

the motoneuron pools of the subcoxal joint (see also Fig. 10B). On average, the cycle period for the rhythm in the FT joint extensor motoneurons was  $2.3 \pm 0.2$  s (four animals, 308 cycles). Intracellular recordings from FT joint flexor motoneurons showed them to be active in antiphase with the excitatory extensor motoneurons (not shown). As described for the slow and fast CT joint depressor motoneurons, not every burst in the SETi was accompanied by a suprathreshold activation of the FETi (Fig. 7Bi). Nevertheless, intracellular recordings of FETi showed that it received synaptic drive in time with the observed SETi rhythm (Fig. 7Bi). The observed rhythm in the extensor motoneurons was repeatedly interrupted by pauses lasting for 2–5 cycles. Intracellular recordings from the excitatory extensor motoneurons showed that this was due to a strong inhibition superimposed on the rhythmic synaptic drive in the motoneurons (Fig. 7Bi; see below).

#### *Pilocarpine-induced activity in the common inhibitor 1 motoneuron*

Application of pilocarpine also affected the activity of the common inhibitor 1 motoneuron (CI1). In the untreated isolated mesothoracic ganglion, CI1 spiked rarely (0.1–0.2 Hz), as in the inactive or restrained intact animal (see Bässler, 1983). Pilocarpine application increased the activity of CI1 prior to any rhythmicity exhibited by the other motoneurons. The activity of CI1 could be recognized in recordings from nerves nl2 (protractor nerve) and nl5 (retractor nerve) because its action potentials occur with constant latency in both recordings. As rhythmicity was established, CI1 activity was modulated with the existing rhythm of the subcoxal motoneurons. CI1 showed a clear minimum of activity at the beginning of a protractor burst (Fig. 8A) and was maximally activated at the end of a protractor burst and the beginning of a retractor burst (Fig. 8B). We confirmed this result in seven other preparations.

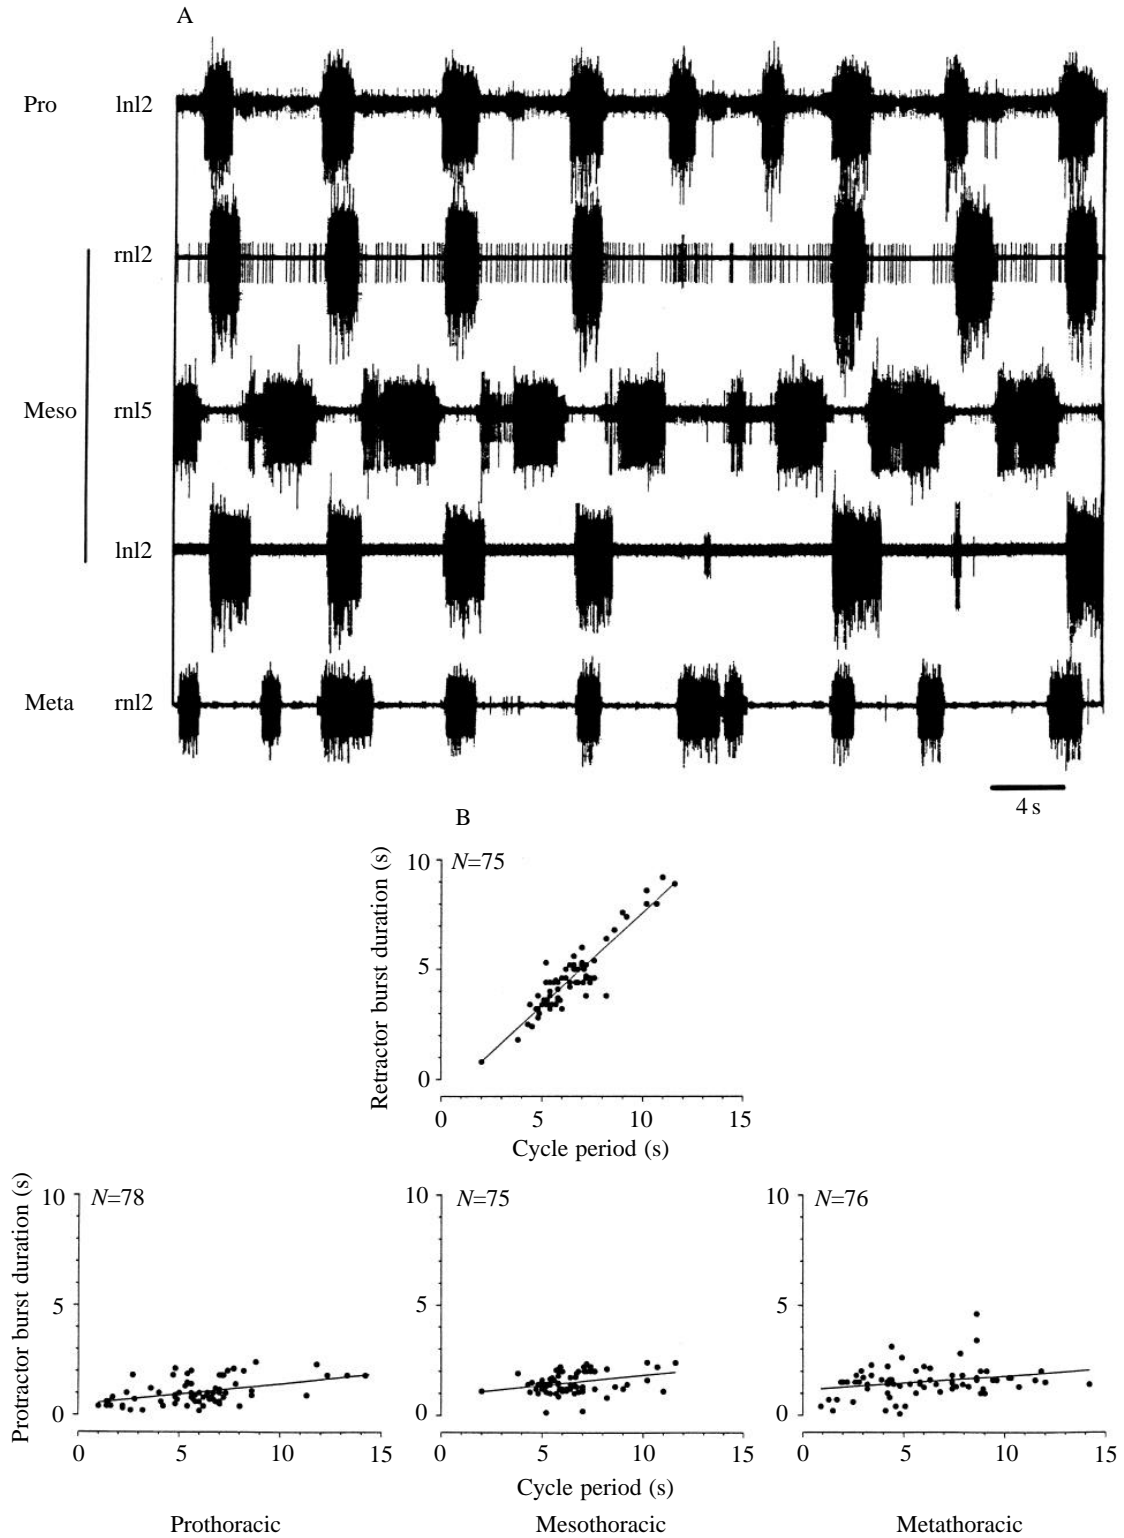

Fig. 6. Intersegmental coordination of the activity of the excitatory protractor motoneurons in the deafferented chain of thoracic ganglia. (A) Bursts of activity in the protractor nerves of the pro-, meso- and metathoracic ganglia. The activity of the right mesothoracic retractor nerve is given as a reference. Pro ln2, left prothoracic nl2; Meso rnl2, rnl5, right mesothoracic nl2 and nl5; meso ln2, left mesothoracic nl2; Meta rnl2, right metathoracic nl2. (B) Plots of the protractor and retractor (mesothoracic only) burst duration *versus* the cycle period for the pro-, meso- and metathoracic rhythms. *N* gives the number of cycles evaluated.

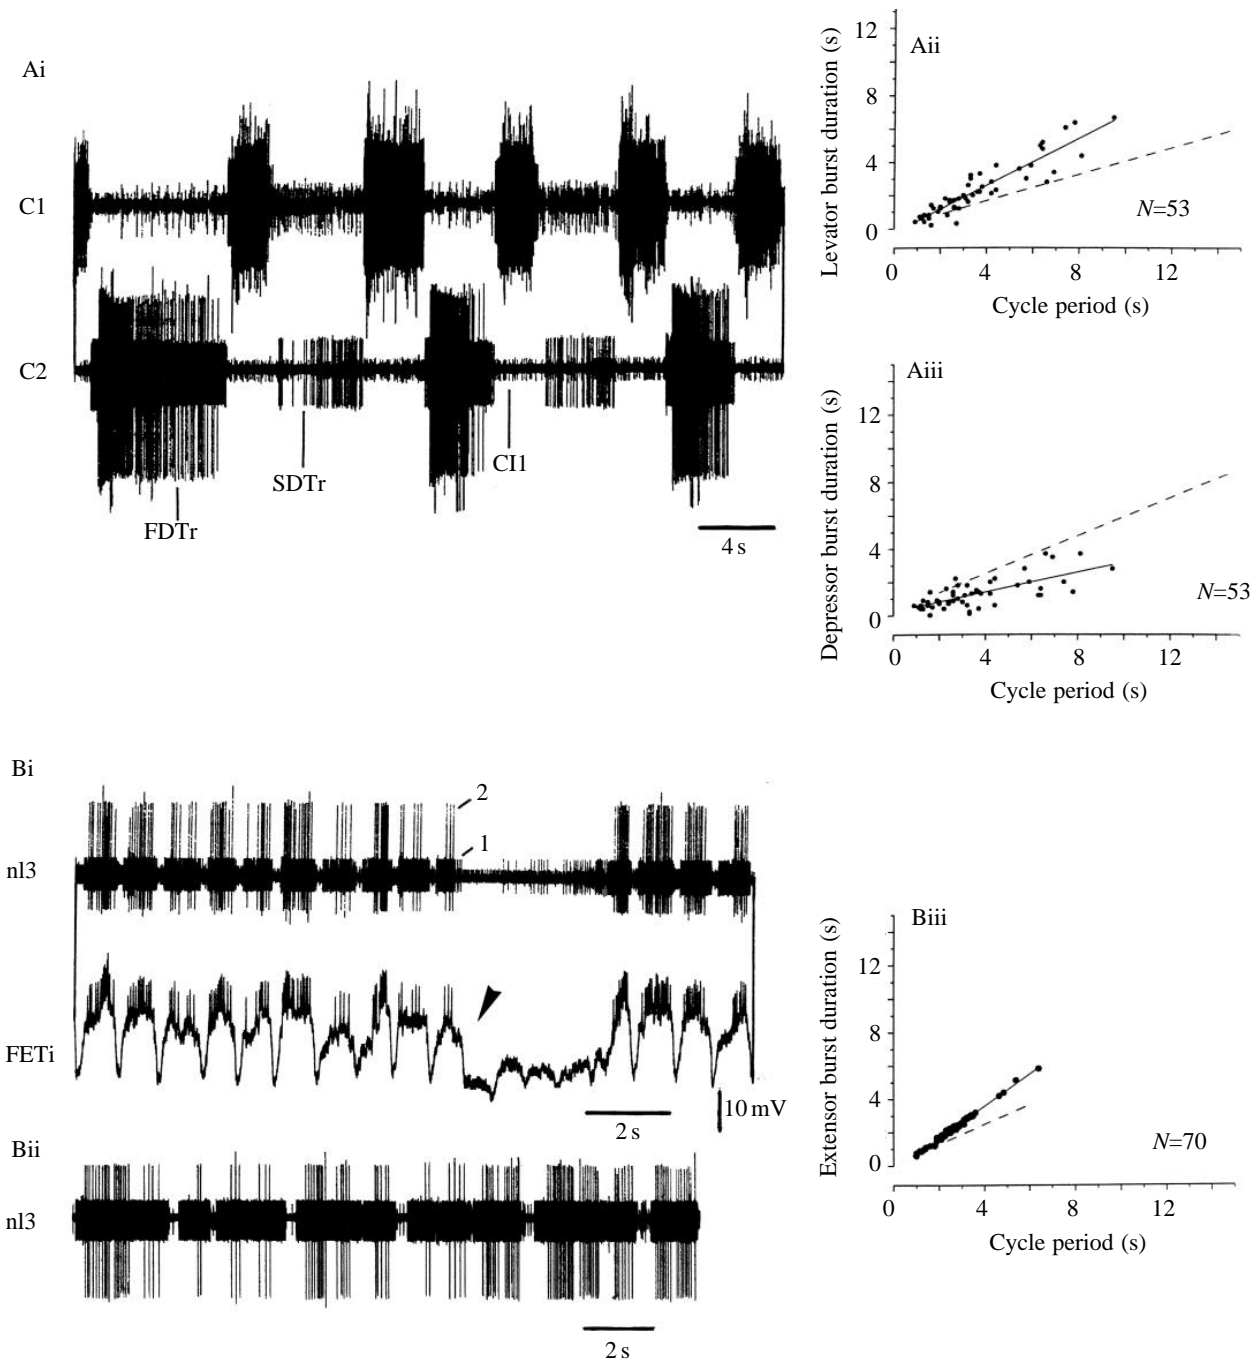

Fig. 7. (A) Rhythmicity in the excitatory motoneurone pools supplying the coxa–trochanter joint. (Ai) Extracellular recordings from the levator trochanteris nerve (C1) and the depressor trochanteris nerve (C2) in the isolated mesothoracic ganglion following application of  $5 \times 10^{-3} \text{ mol l}^{-1}$  pilocarpine. Note action potentials with three different amplitudes in nerve C2: these correspond to FDT<sub>r</sub>, SDT<sub>r</sub> and CI1 (Schmitz, 1986). The dependence of burst duration of excitatory levator and depressor motoneurons on cycle period is given in Aii and Aiii, respectively. The solid lines are the regressions for the data points. The dashed lines are regressions from another animal. (B) Rhythmicity in the extensor motoneurons of two preparations (i,ii) following pilocarpine application. Extracellular recordings from nerve n3, showing burst activity of SETi (1) and FETi (2). In Bi, FETi motoneurone was recorded simultaneously intracellularly. Note the similarity between the modulation of membrane potential in FETi and the modulation of SETi activity (see text). The arrowhead marks a spontaneously occurring inhibition superimposed on the observed rhythmicity (see text for further details). (Biii) Dependence of the burst duration in SETi on cycle period. The solid line is the regression for the data given in Bii. The dashed line is the regression from a different animal.

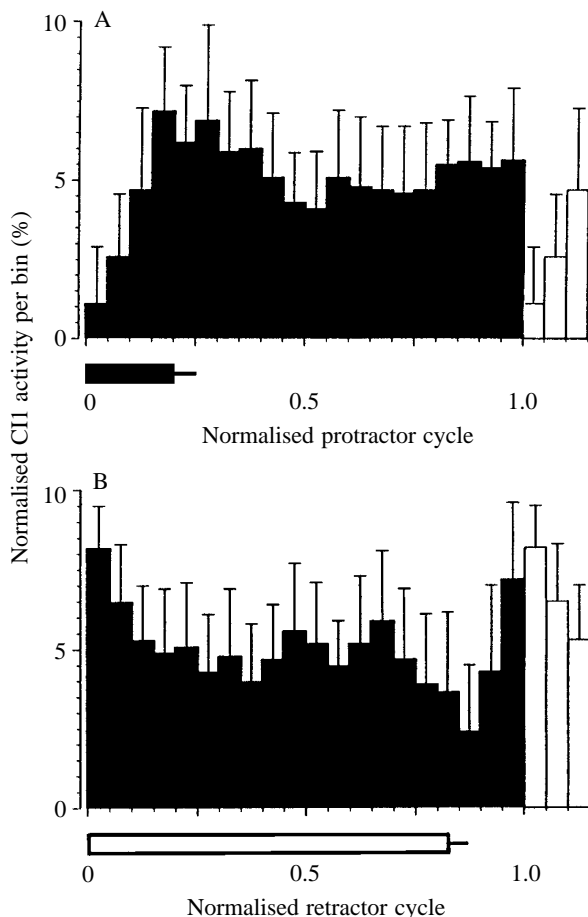

Fig. 8. Modulation of activity in the CII motoneurone following bath application of pilocarpine ( $4 \times 10^{-3} \text{ mol l}^{-1}$ ). Normalised averaged activity ( $\pm$ S.D.) of CII in the normalised protractor (A) and retractor (B) cycle (data derive from 23 consecutive cycles of a typical experiment). For clarity, the first three histogram bins are repeated at the end of the normalised cycle (open bars). Horizontal bars denote the average ( $\pm$ S.D.) normalised protractor (filled bar) and retractor (open bar) burst durations.

#### *Coordination of the motoneurones supplying muscles of different leg joints: recurrent patterns of activity*

In the isolated mesothoracic ganglion, we recorded simultaneously from different motor nerves. These were the nerves supplying the muscles of the subcoxal, CT and FT joints. The rhythms exhibited by motoneurones supplying each of these joints have been described above. We did not find significant coupling in the burst activity between the rhythms of the motoneurones supplying the three different joints. This is most obvious from simultaneous recordings of the activity of the protractor motoneurones supplying the subcoxal joint and extensor motoneurones supplying the femur–tibia joint (Fig. 9A). The rhythms exhibited by the motoneurone pools of leg joints were in general not coupled to each other from cycle to cycle (see below). For example, the onsets of bursts in SETi and FETi did not show a significantly preferred phase in the cycle of subcoxal

motoneurones (Fig. 9B,C; circular statistics for extensor bursts in protractor cycle:  $r=0.07$ ;  $z=0.58$ ;  $N=134$ ;  $P>0.1$ ). The same was true for the onsets of bursts in protractor motoneurones occurring during the extensor cycle (Fig. 9D; circular statistics for protractor bursts in extensor cycle:  $r=0.19$ ;  $z=2.6$ ;  $N=71$ ;  $P>0.1$ ). Similar results were obtained from the evaluation of the burst activity between the subcoxal and the CT joint (circular statistics for the experiment shown in Fig. 9: protractor bursts in depressor cycle:  $r=0.03$ ;  $z=0.05$ ;  $N=71$ ;  $P>0.1$ ; depressor bursts in protractor cycle:  $r=0.1$ ;  $z=0.66$ ;  $N=66$ ;  $P>0.1$ ), as well as the CT and the FT joint (e.g. circular statistics for the experiment shown in Fig. 9: depressor bursts in extensor cycle:  $r=0.18$ ;  $z=2.71$ ;  $N=79$ ;  $P>0.1$ ; extensor bursts in depressor cycle:  $r=0.14$ ;  $z=2.58$ ;  $N=134$ ;  $P>0.1$ ). We occasionally observed that the activity of motoneurone pools of one leg joint changed in time with changes in the activity of motoneurone pools of other leg joints. This is demonstrated in Fig. 10A, where retractor activity during a burst was sometimes increased with activity in the SDTr motoneurone.

Although there was no cycle-to-cycle coupling between the rhythms of the motoneurones of different joints, we found spontaneous, recurrent patterns of activity (SRPs) in about 90% of the experiments (30 animals). These patterns strongly interfered with the existing rhythm in the motoneurone pools supplying an individual joint. In contrast to the ‘normal’ rhythms in the antagonistic motoneurone pools of each leg joint, these recurrent patterns showed a strong coupling between the activity of the different motoneurone pools (see below). We found three different types of SRPs.

The most common SRP, called SRP1, was characterised as follows (Fig. 10A). During a combined burst of the depressor motoneurones SDTr and FDTr, protractor motoneurones were active at first. In many cases, their activity increased as the depressor burst started (Fig. 10A, arrowheads). During the existing SDTr/FDTr burst, the protractor burst stopped and a burst occurred in the retractor motoneurones. In the majority of occurrences of SRP1 (about 78%,  $N=155$  SRPs for six animals), there was one switch from protractor to retractor motoneurone activity during the FDTr/SDTr burst (Fig. 10A,B and see below). The activity of the simultaneously active subcoxal motoneurone pool, usually the retractor motoneurones, stopped near the end of the FDTr/SDTr burst (Fig. 10). However, in about 22% of occurrences of SRP1 ( $N=155$  for six animals), there was more than one switch between protractor and retractor activity (see below), mostly (about 15%) attributable to the fact that the retractor activity ended earlier than the depressor burst (see below).

The activity of the motoneurones supplying the FT joint was also incorporated into SRP1 (Fig. 10B). Prior to the SDTr/FDTr burst, SETi and, usually, FETi were active. Their activity was dramatically reduced or even stopped when the burst in the depressor motoneurones started. In general, no activity occurred in the extensor motoneurones during the burst in the depressor motoneurones. At the end of the burst in the depressor motoneurones, FETi and SETi became active again.

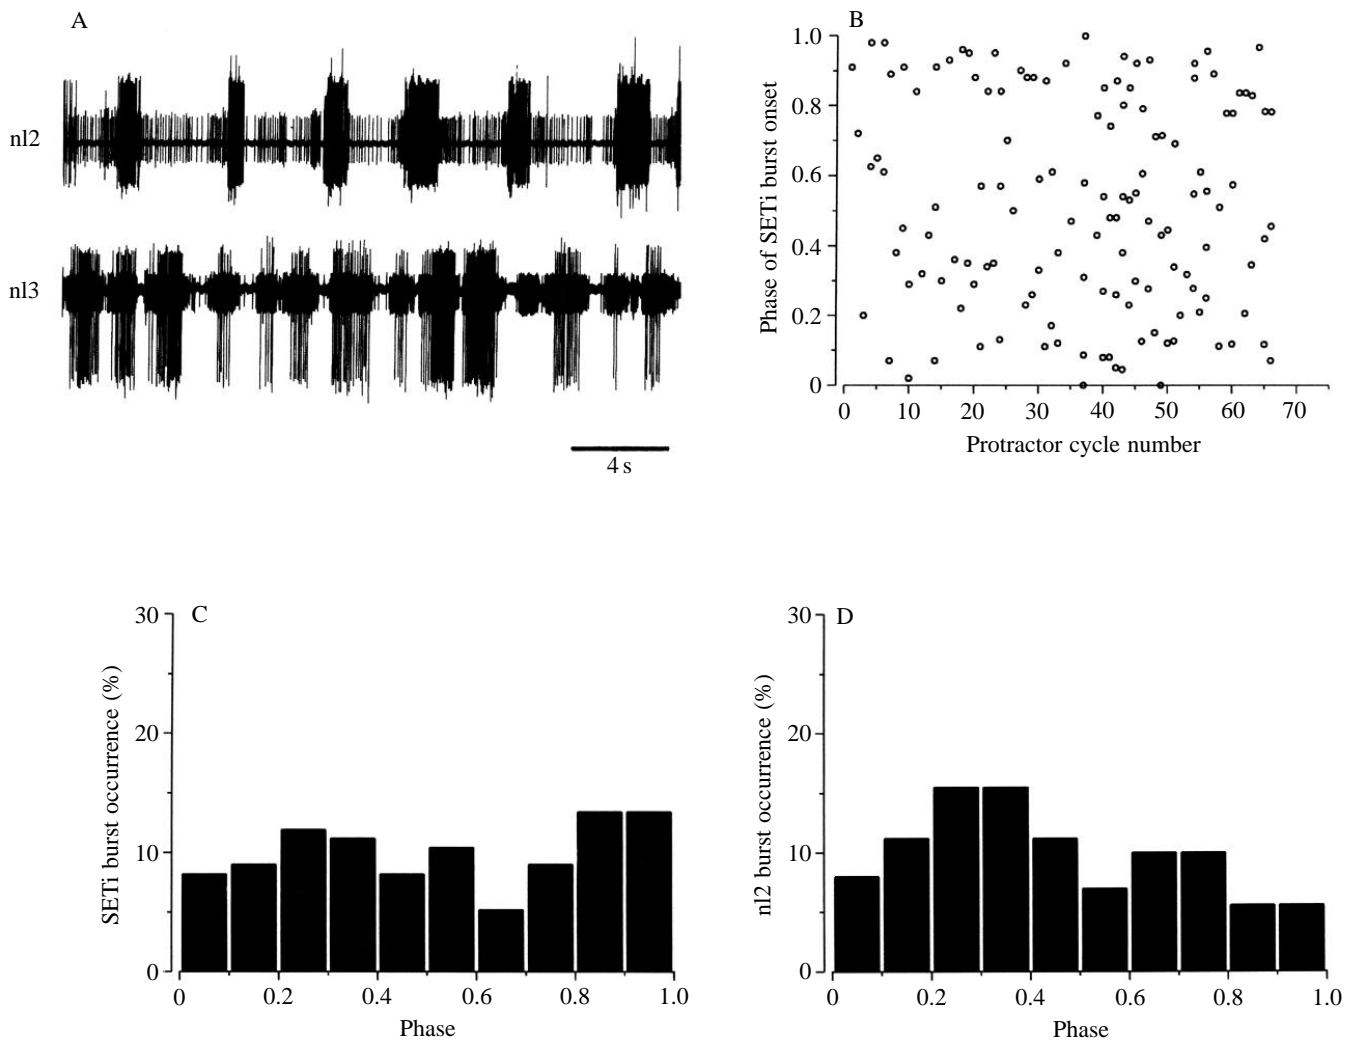

Fig. 9. Simultaneous recordings of the activity of motoneurones supplying the subcoxal joint and motoneurones supplying the femur–tibia joint in an isolated mesothoracic ganglion. (A) Original recording showing the activity of the motoneurones innervating the protractor coxae (n12) and the extensor tibiae (n13). (B) Plot of the phase of the onset of extensor bursts in the protractor cycle as a function of the number of the protractor cycle. (C) Phase histogram for the onset of extensor bursts in the protractor cycle (134 extensor cycles were evaluated; see text for circular statistics and Materials and methods for explanation). (D) Phase histogram of the onset of protractor bursts in the extensor cycle (71 protractor cycles were evaluated; see text for circular statistics). Data for A–D derive from the same preparation.

The time course of the membrane potential in FETi during SRP1 is shown in Fig. 7Bi (arrowhead).

This pattern of strictly coupled activity in the motoneurone pools of the three proximal leg joints occurred exclusively during bursts performed by both the SDTr and FDTr (Figs 10, 11A). We hardly ever (Fig. 11A) observed this pattern in the absence of FDTr activity (Figs 7, 10). The frequency of occurrence of SRP1 is shown in Fig. 11B as a function of depressor burst number for three different preparations. From this evaluation, it is obvious that the frequency of occurrence of SRP1 was variable and unpredictable within each preparation.

The duration of the FDTr/SDTr burst in SRP1 could vary within a single preparation and from one preparation to another, ranging from 1.5 to 8 s (Fig. 11C). In contrast, the latency from the start of the depressor burst until the first, usually the only,

switch from protractor to retractor activity was less variable (Fig. 11C). A quantitative evaluation for four animals showed that this switch occurred on average  $1.2 \pm 0.14$  s ( $N=126$ ) after the onset of the depressor burst, irrespective of its duration (Fig. 11C). For a single animal, the standard deviation for this latency measurement could be as low as 0.1 s (see Fig. 13A). Whenever a FDTr/SDTr burst occurred with no SRP (Fig. 11A), the FDTr/SDTr burst had a duration of 1 s or less.

In about one-fifth of the occurrences of SRP1 evaluated, protractor and retractor motoneurones produced more than one switch in their activity during the FDTr/SDTr burst (Fig. 12, see above). Two switches occurred mostly when retractor activity ended a bit earlier than the depressor burst, and thus protractor activity began again before the end of the depressor burst. Less frequently (5.2% of occurrences) protractor and

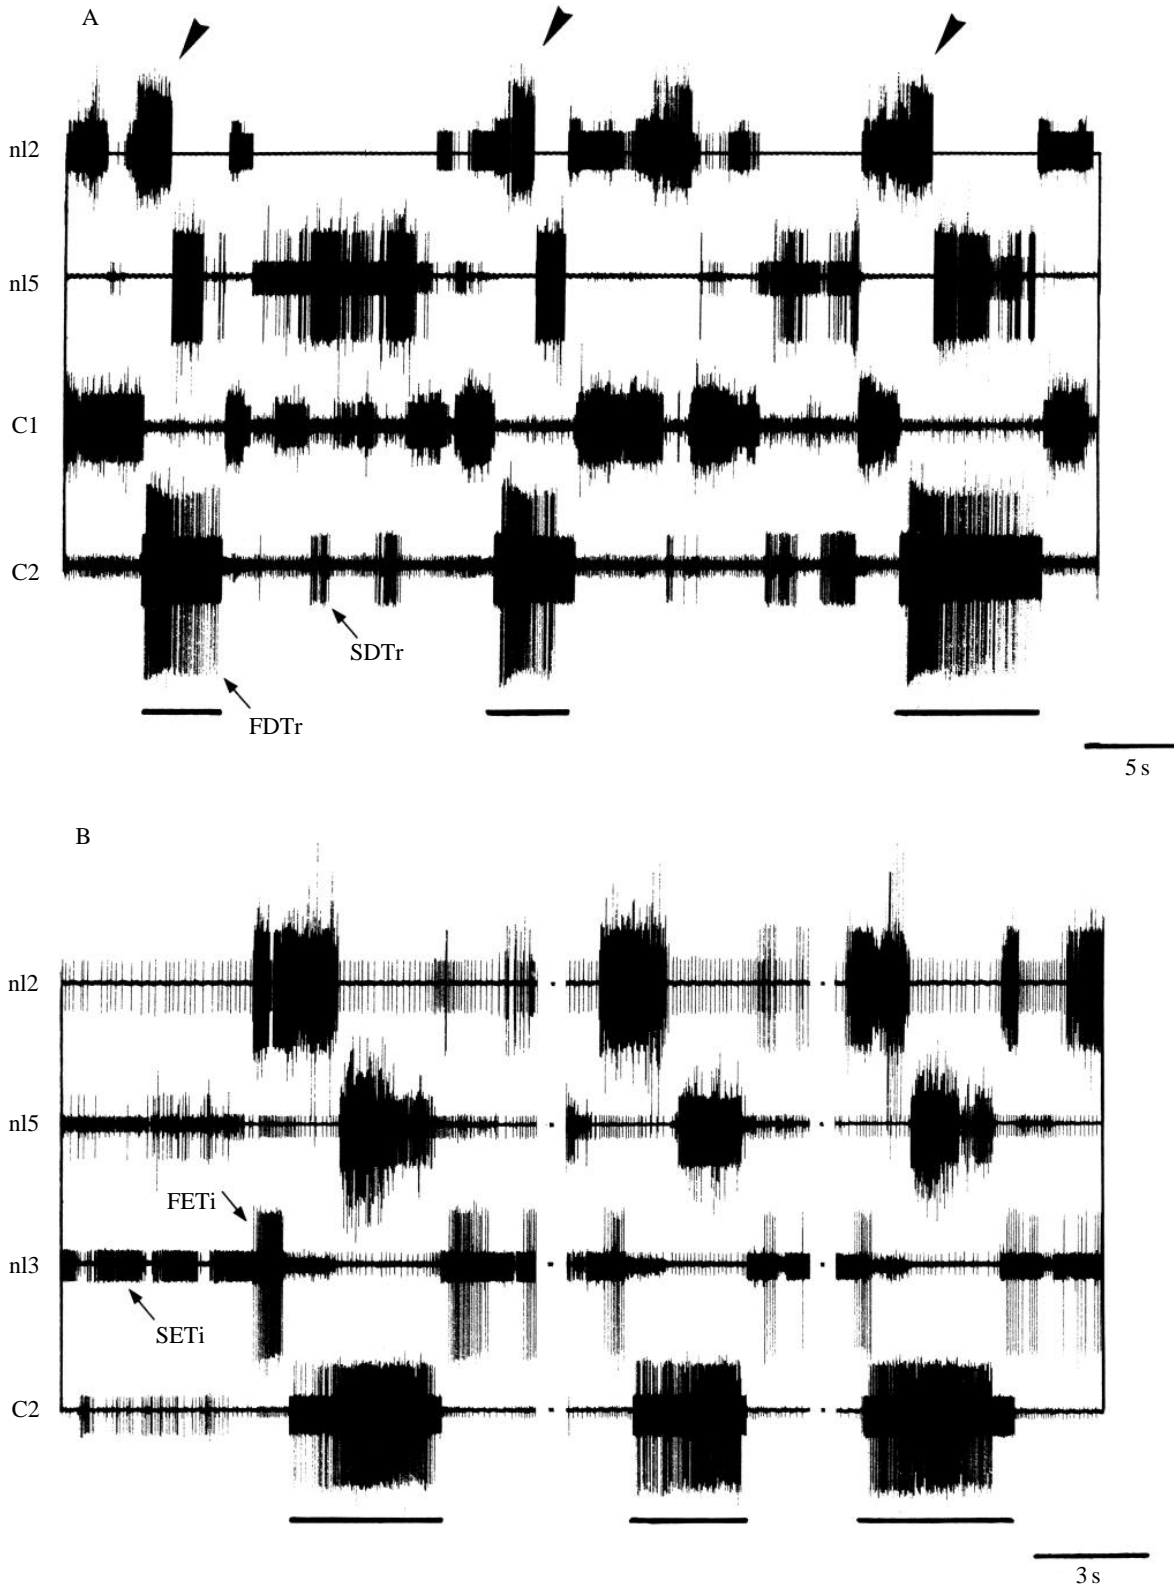

Fig. 10

retractor motoneurone pools showed more than two switches in their activity during the FDTTr/SDTr burst (Fig. 12).

In summary, Fig. 13A shows a schematic representation of

the motoneuronal activity in the recorded motoneurone pools of the three proximal leg joints during SRP1 in the isolated mesothoracic ganglion.

Fig. 10. A spontaneous, recurrent pattern of activity (called SRP1, black bars, see text) in the isolated mesothoracic ganglion. (A) Simultaneous recordings of the activity of the subcoxal (protractor coxae, nl2; retractor coxae, nl5) and the coxa-trochanter (levator trochanteris, C1; depressor trochanteris, C2) motoneurone pools following application of  $5 \times 10^{-3} \text{ mol l}^{-1}$  pilocarpine. Note the rhythmic activity in the antagonistic motoneurone pools and the activity pattern that only occurs with a combined FDTr/SDTr burst. The arrowheads mark protractor activity during the first part of the depressor burst (see text). (B) Simultaneous recordings of the activity of the subcoxal motoneurone pools (nl2, nl5), the extensor tibiae motoneurones (nl3) and the depressor trochanteris motoneurones (C2). Note that no SETi and FETi activity is visible during the FDTr/SDTr bursts. The C11 motoneurone is the only neurone in nl3 that is active during the depressor bursts.

We found two other types of SRPs in the motoneurone pool activity during pilocarpine-induced rhythmicity in the mesothoracic ganglion. These SRPs were much less frequent than SRP1 (5–8% of all occurrences of an SRP). As for SRP1,

SRP2 occurred with a burst in the FDTr/SDTr motoneurones (Fig. 13B). SRP2 started with a depressor burst coincident with retractor activity. During the depressor burst, retractor activity stopped and protractor activity started. As described for SRP1, tibial extensor motoneurones were inhibited during the depressor burst. Thus, this pattern resembled a 'reversed SRP1'. SRP3, the third type of SRP, involved a burst in the FETi and SETi motoneurones. During this burst, first the retractor motoneurones were active and then activity switched to the protractor motoneurones (Fig. 13C). During the burst in the extensor motoneurones, activity in the depressor motoneurones was strongly decreased, i.e. FDTr was never found to be active and SDTr generated few action potentials (not shown). Because of the low frequency of occurrence of SRP2 and SRP3, they were not quantified in more detail.

*Pilocarpine-induced rhythms in intact, restrained animals*

The results presented above demonstrate the ability of pilocarpine to induce rhythms in the motoneurone pools of

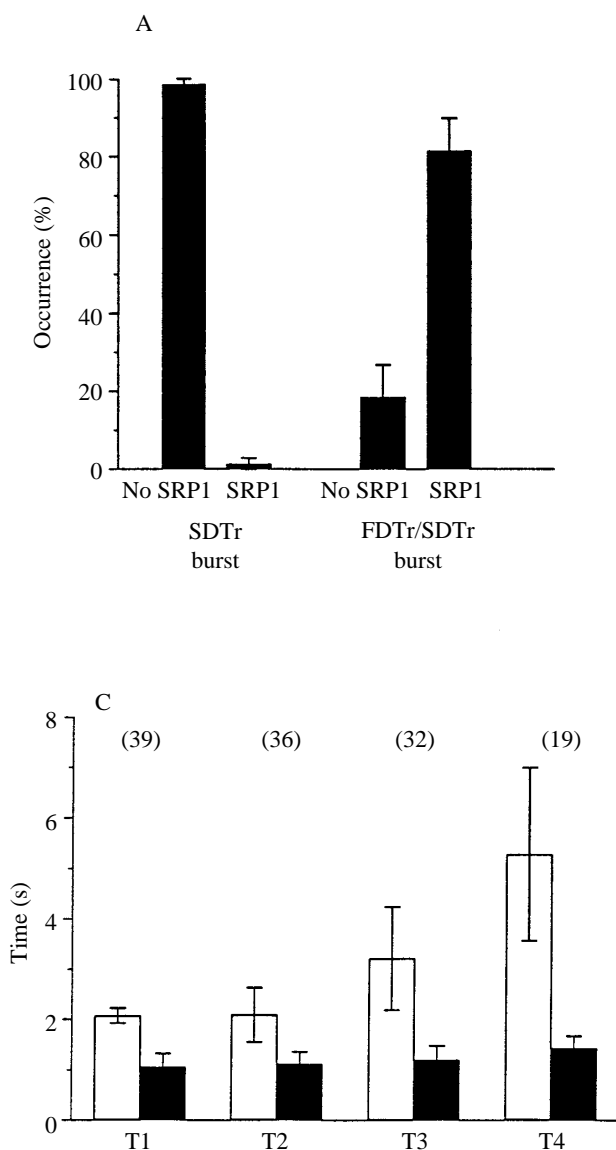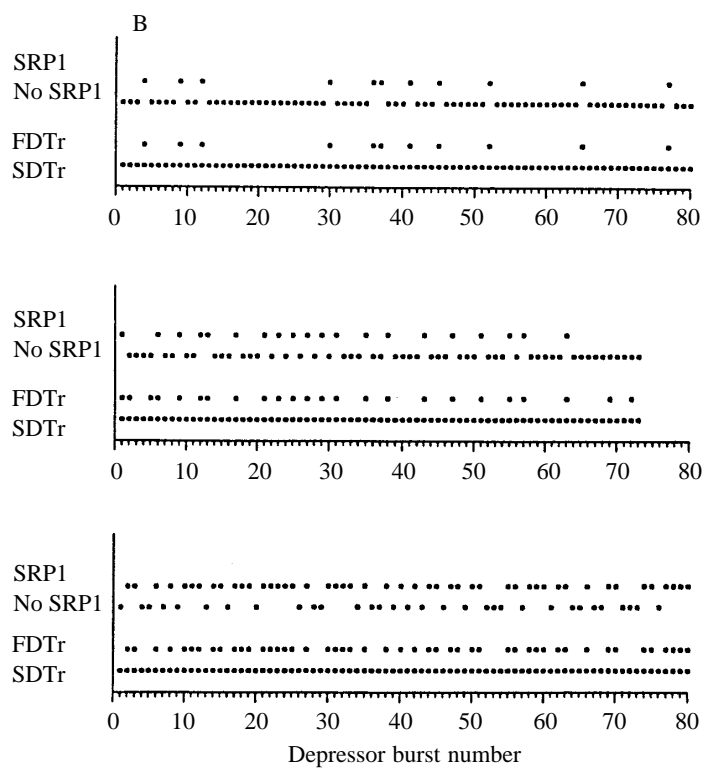

Fig. 11. (A) Quantitative evaluation of the occurrence of SRP1 during SDTr and/or SDTr/FDTr bursts (331 bursts evaluated in four preparations). (B) Occurrence of SRP1 as a function of depressor burst number (1–80) for three different preparations. Note that SRP1 only occurs during simultaneous bursts of SDTr and FDTr. (C) Comparison of the average duration of the depressor burst during SRP1 (open columns) and the average latency between the beginning of slow depressor activity and the first switch from protractor to retractor activity (filled columns) in four animals (T1–T4). The numbers in parentheses are the numbers of occurrences of SRP1 evaluated per preparation. Values are means  $\pm$  s.d.

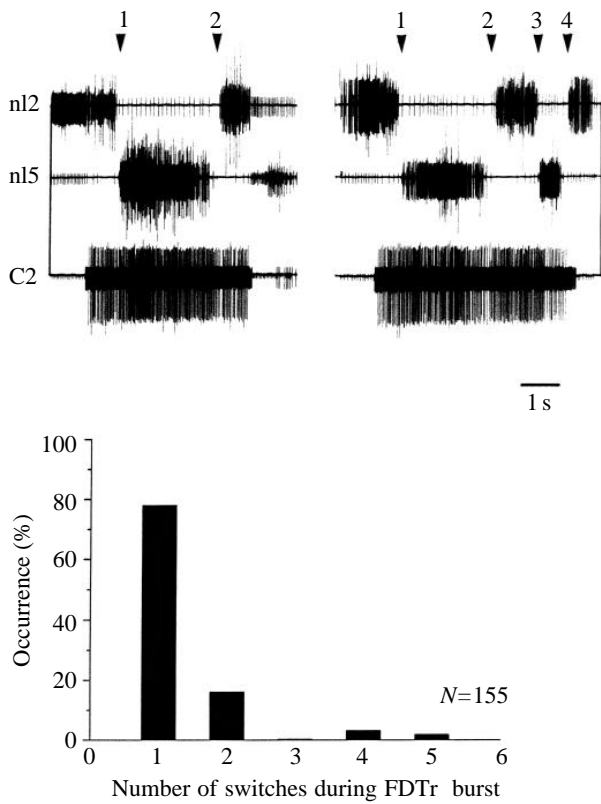

Fig. 12. Frequency of one or multiple switches in protractor and retractor activity during an SDTr/FDTr burst of SRP1. At the top are two examples of SRP1 that show two and four switches (marked by arrowheads) in activity between protractor and retractor activity. The plot at the bottom shows the percentage of each number of switches between protractor and retractor activity during occurrences of SRP1 for six preparations.

totally denervated ganglia. We repeated all the experiments described above using 42 intact, but totally immobilised, animals. In these animals, all position-sensitive proprioceptors would indicate constant values, and those proprioceptors sensitive to velocity would be inactive. Proprioceptors signalling muscle tension or cuticular stress might still be phasically stimulated as a result of isometric muscle contraction during the induced rhythmic motor activity.

Application of pilocarpine at concentrations higher than  $1 \times 10^{-4} \text{ mol l}^{-1}$  reliably induced rhythms in the motoneurone pools of the subcoxal joint. Quantitative evaluation of the data showed no difference in the characteristics of the rhythms from those presented in Figs 1–6. Rhythmic activity was also induced in the motoneurone pools supplying levator and depressor trochanteris muscles, but there was one clear difference from the results obtained with denervated animals: the rhythm was above threshold only for the SDTr; the FDTr rarely produced any action potentials. Nevertheless, the rhythm in the CT joint consisted of strictly alternating bursts of activity of the motoneurons belonging to the levator pool and the SDTr. The timing was more variable than that described for the denervated animal (see Fig. 7). For example, the ratio of

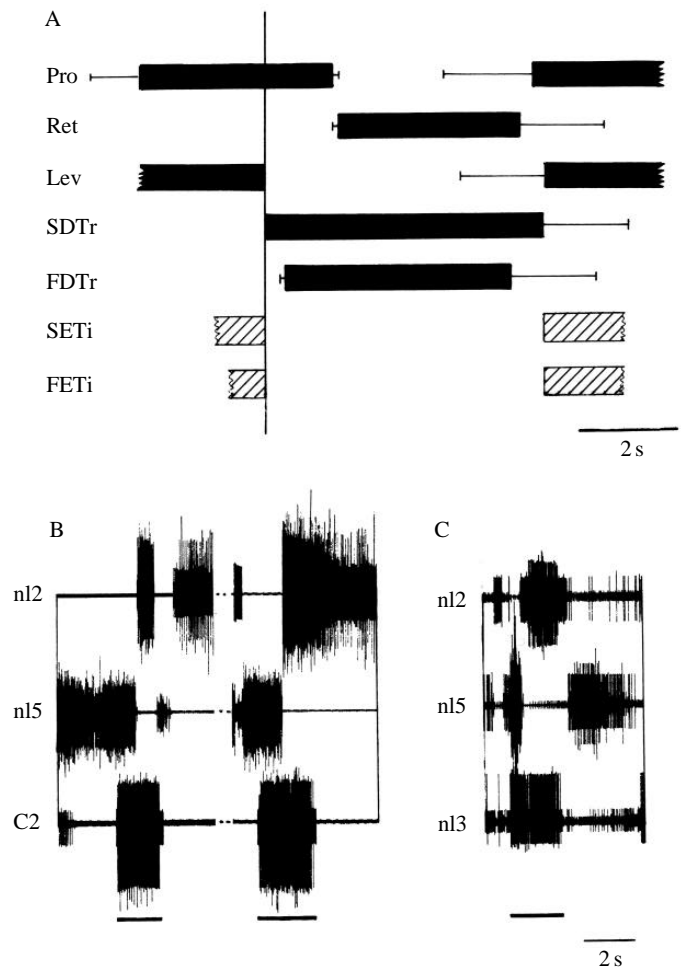

Fig. 13. (A) Schematic drawing of the average (+s.d.) motoneuronal activity during SRP1 in the middle leg motoneurone pools. Data for subcoxal and coxa-trochanter joint motoneurone activity (filled bars) derive from the experiment shown in Fig. 10A and were averaged for 11 subsequent occurrences of SRP1. The vertical line indicates the start of SDTr activity, which was the reference point of the evaluation. The activity of the excitatory extensor motoneurons (hatched bars) was added according to their established activity. (B,C) Examples for the two other observed SRPs (see text). B, SRP2; C, SRP3.

levator to depressor burst duration changed over time, irrespective of cycle period. The levator/depressor cycle period was also more variable and differed from the cycle period of the subcoxal motoneurons more than in the denervated situation: for example, in six animals tested with  $2 \times 10^{-3} \text{ mol l}^{-1}$  pilocarpine, the cycle period of the motoneurons supplying the CT joint was  $4.3 \pm 2.4 \text{ s}$  ( $N=254$ ), whereas it was  $5.7 \pm 1.9 \text{ s}$  ( $N=254$ ) for the motoneurons supplying the subcoxal joint.

The most striking difference, however, concerns the occurrence of SRPs. In 14 animals, each tested for several hours, neither SRP1 nor SRP2 was ever observed (Fig. 14A). SRP3 was seldom observed. However, SRP1 reliably occurred after total denervation of the hemiganglion under investigation. After the main leg nerve had been cut, the FDTr in each animal



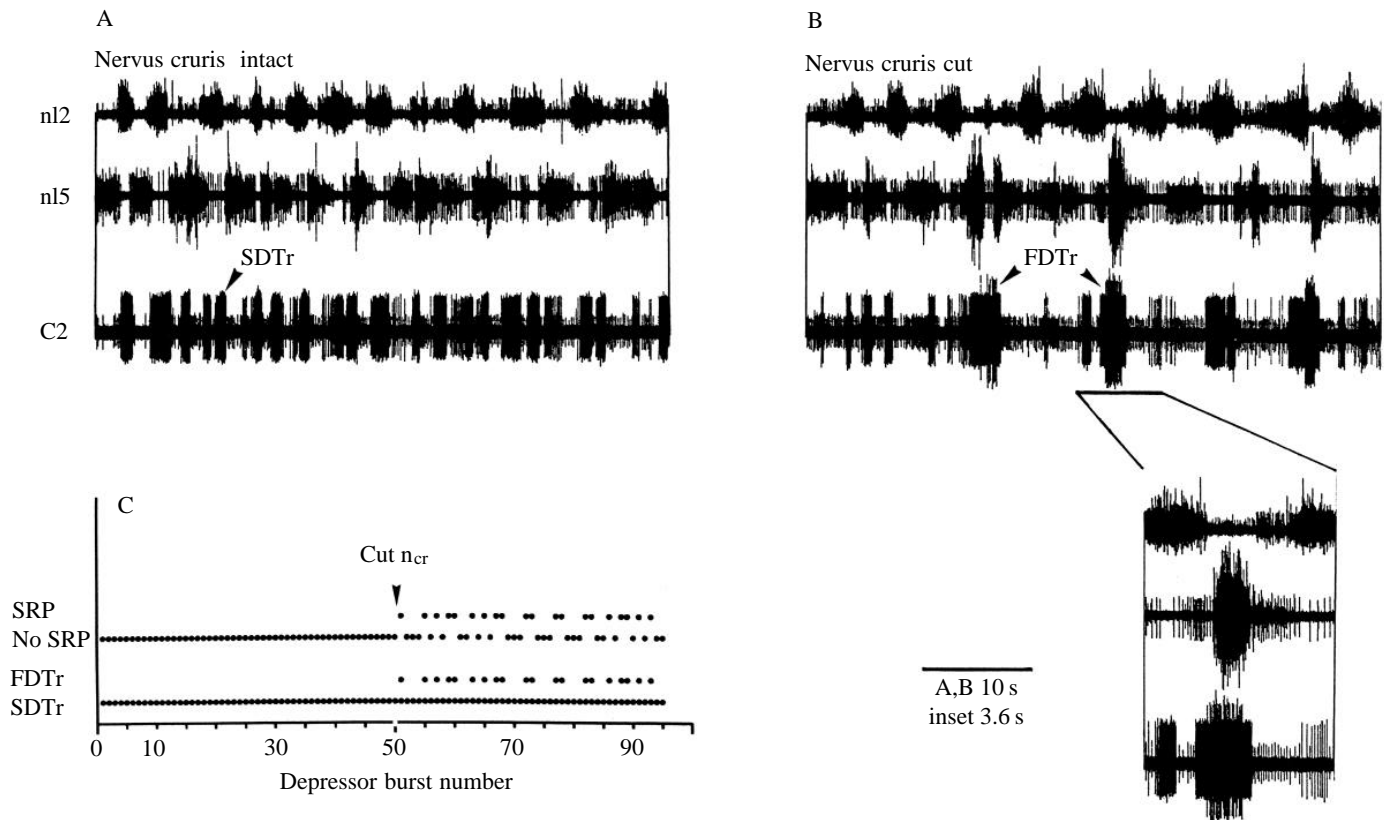

Fig. 14. Rhythmicity of the subcoxal (n12, protractor nerve; n15, retractor nerve) and coxa-trochanter motoneurone pools (C2, depressor trochanteris) in the restrained preparation. (A) Pilocarpine-induced rhythms of a mesothoracic ganglion denervated except for the nervus cruris ( $n_{cr}$ ). Note that the SDTr (arrowhead) is the only one of the depressor motoneurones activated. (B) Rhythmicity in the same preparation after cutting the ipsilateral main leg nerve, the nervus cruris. Note the occurrence of SRP1 together with suprathreshold activation of the FDTTr. The enlarged inset shows one occurrence of SRP1 in more detail. (C) Occurrence of SRP1 as a function of depressor burst number (1–95) for another preparation before and after cutting the ipsilateral nervus cruris.

occasionally became activated above threshold. During those depressor bursts involving both SDTr and FDTTr, switching from protractor to retractor activity occurred reliably (Fig. 14). Further enhancement of the frequency of occurrence of SRP1s was observed following denervation of the contralateral hemiganglion and after cutting the anterior and the posterior connectives.

## Discussion

### *Pilocarpine-induced rhythmicity*

In the isolated thoracic nervous system of the stick insect, bath application of the muscarinic cholinergic agonist pilocarpine induced long-lasting strictly alternating rhythms in antagonistic leg motoneurone pools (slow, semi-fast and fast motoneurones) (Figs 1–7). A similar rhythmicity could be induced in intact and in partially deafferented preparations (Fig. 14). Pilocarpine reliably induced rhythmic activity at concentrations higher than  $1 \times 10^{-4} \text{ mol l}^{-1}$ . Experiments with desheathed ganglia in the phasmid species *Extatosoma tiaratum* (see Debrod and Bässler, 1989) revealed threshold concentrations of  $1 \times 10^{-6} \text{ mol l}^{-1}$  pilocarpine for the induction

of rhythmicity (O. Dittberner and A. Büschges, unpublished results). This concentration is in the range of threshold concentrations reported for the locust (Ryckebusch and Laurent, 1993) and crayfish (Chrachri and Clarac, 1987). Perhaps the ganglion sheath of the stick insect is less permeable to pilocarpine than are those of the locust and the crayfish.

Application of atropine immediately abolished the rhythms, indicating that muscarinic cholinergic receptors underlie the pilocarpine-induced rhythm. We have no information about the detailed neuronal mechanisms by which pilocarpine induces the particular rhythms observed. There is generally little information about the distribution of muscarinic cholinergic receptors in invertebrates (Breer and Sattelle, 1987; Leitch *et al.* 1993) and there is even less information on their physiological role in nervous systems (Davis and Pitman, 1991; Trimmer and Weeks, 1991). However, the present investigation again suggests that muscarinic agonists are involved in the generation of rhythmic motor patterns (see also Chrachri and Clarac, 1987; Elson and Selverston, 1992; Ryckebusch and Laurent, 1993).

Some characteristics of the induced rhythms depend on

pilocarpine concentration. Increasing pilocarpine concentration decreased the cycle period of the rhythm, as shown for the subcoxal motoneurone pools. For the protractor motoneurone pool, burst duration increased with increasing pilocarpine concentration. The ratio of burst duration to cycle period at a given pilocarpine concentration was rather variable in the motoneurones supplying the muscles of the CT and the FT joints. With the exception of the excitatory protractor coxae motoneurones, the burst activity of the recorded motoneurone pools (retractor coxae, levator trochanteris, depressor trochanteris, extensor tibiae) depended on the cycle period. In contrast, the protractor burst duration in each preparation was fairly constant at a given pilocarpine concentration. Nearly all of the remaining cycle period was filled with retractor burst activity of variable duration; hence, the retractor burst duration strongly depended on the cycle period. The protractor burst duration was therefore the most consistent. The activity of the common inhibitor 1 motoneurone (CI1) was also affected by pilocarpine. CI1 activity was modulated with the existing subcoxal rhythm even though it also innervates the muscles of the CT and FT joints.

*The motoneurone pools of each leg joint are driven by discrete rhythm generators*

Pilocarpine induced alternating rhythms in the antagonistic motoneurone pools of each leg joint. However, there was no stereotyped cycle-to-cycle coupling in the activity of the motoneurone pools supplying the different leg joints. Each pair of antagonistic motoneurone pools of each leg joint exhibited strictly alternating activity, thus functioning as a discrete oscillating module (joint module). The cycle periods of each module differed: the cycle period of the burst activity in the tibial extensor motoneurones (SETi and FETi) was approximately half that of the motoneurone pools supplying the CT or the subcoxal joints. It has to be taken into account that our investigation was mainly concerned with the activity in the motoneurone pools during rhythmic activity. Thus, from our current knowledge and from the chosen approach, we cannot exclude the existence of more subtle couplings between the joint modules during pilocarpine-induced rhythms. A subsequent investigation of the neuronal mechanisms of the generation of pilocarpine-induced rhythmicity will attempt to investigate this.

Rhythms in the investigated joint modules were not totally independent of each other. In the majority of the preparations, we found SRPs (spontaneous recurrent patterns) involving reproducible coupling between the joint modules. We have no information yet on the neural mechanisms of this coupling. There are at least two alternative explanations: (i) that the observed SRPs are produced by another discrete oscillating neural system that has access to the joint modules and that is able to override their existing activity; (ii) that the neurones within each joint module (interneurones or motoneurones) themselves exhibit variable coupling to neurones within other joint modules, so that there is a state in which there is no coupling between the modules, as well as other states in which

certain modules are coupled. Intact, restrained animals only showed SRP3s, indicating an important role of sensory pathways in suppressing SRPs (at least for SRP1 and SRP2), i.e. strictly coordinated activity patterns of different leg joints. Such sensory pathways might either inhibit the SRP-producing network (hypothesis I) or change the coupling strengths among the joint modules (hypothesis II). The observation that the FDTr motoneurone is never activated above threshold in restrained animals shows that sensory information, in this case, decreases the amplitude of pilocarpine-induced activation of FDTr. This might support hypothesis II, as lower-amplitude oscillations could cause weaker coupling strengths among the joint modules and hence prevent occurrences of SRP1 and SRP2 in these animals. In other rhythm-generating systems, such changing interactions between different rhythm-generating networks have been investigated in detail; for example, in the stomatogastric system (Dickinson and Moulins, 1992).

*Intersegmental coupling of the rhythms*

Our results show that each hemiganglion is able to produce its own rhythms. When the hemiganglia were left connected to each other, the rhythms generated in each hemiganglion tended to synchronise. This was especially true for the protractor-retractor rhythms, which showed a weak but significant preference for in-phase coupling. This phenomenon is best described by the *Magnet-Effekt* introduced by von Holst (1936). In our experiments, there was no evidence for antiphase coupling, because in no preparation did sequences of antiphase coupling exceed three consecutive cycles. These findings again show that the rhythm-generating networks are to some extent independent (see also Foth and Bässler, 1985).

*Comparison of the induced rhythmicity with motor output in different behaviours*

A leg of a stick insect is able to perform the following rhythmic movements that have been analysed in great detail: walking (for summaries, see Bässler, 1983, 1988; Cruse, 1990; Graham, 1985), searching (Bässler, 1993; Bässler *et al.* 1991; Karg *et al.* 1991) and rocking (Pflüger, 1977). Although there is a great variability in the motor outputs during each of these behaviours, mainly due to variations in external variables (see also Cruse, 1976; Graham and Bässler, 1981), some general features can be recognised and compared with the pilocarpine-induced rhythm.

First, in all these behaviours, the excitatory motoneurones of antagonistic muscles are active in antiphase. This is not trivial, because strong co-contractions may occur under certain circumstances (e.g. Graham, 1979). Pilocarpine-induced rhythms in antagonistic motoneurones also exhibited only antiphase activity.

Second, coordination between the motoneurones of different joints of a particular leg is relatively fixed in each of these behaviours, but this coordination differs for the different behaviours. Coordination such as that of the pilocarpine-induced rhythmicity when there was no SRP (no fixed phase

relationships from cycle to cycle, oscillation frequency different for different joints) does not occur in intact animals. However, it does resemble the vigorous motor output of a denervated thoracic ventral nerve cord (Bässler and Wegner, 1983).

Third, walking can be performed in two different gaits. In the tripod gait, swing and stance duration each depend on cycle period. In the tetrapod gait, swing duration is independent of cycle period (Graham, 1972; Wendler, 1964), but may be affected by step amplitude and load (Dean and Wendler, 1983; Dean, 1991). In tetrapod coordination, under normal conditions, the burst duration of several stance muscles depends strongly upon cycle period, whereas the burst duration of the swing muscles is constant (Bässler, 1986). In the pilocarpine-induced rhythms, the activity of one swing muscle (protractor) is independent of cycle period, and the activity of another swing muscle (levator) is dependent upon cycle period at the same time. This does not occur in any known behaviour.

When the suboesophageal ganglion is separated from the thoracic ventral nerve cord (as in the isolated preparation), the hindlegs walk backwards while the forelegs walk forwards (Bässler *et al.* 1985). One would therefore expect that, in a fictive walking pattern under these conditions, the retractor swing burst duration in a hindleg would be independent of cycle period. In contrast, the protractor burst duration is independent of cycle period in the pilocarpine-induced rhythm.

Fourth, during forward walking, the common inhibitory motoneurone 1 (CI1) is maximally active at the transition from retraction to protraction (Büschges *et al.* 1994; Graham, 1985). In the pilocarpine-induced rhythm, it is minimally active at this point. During rocking, CI1 rarely fires (Bässler and Wegner, 1983; Pflüger, 1977). The activity of CI1 during searching movements has not yet been recorded but, from observations of leg movements during searching (stereotyped movements mainly in the CT and FT joints; Karg *et al.* 1991), one would expect modulation of CI1 activity to be linked to the CT rhythm rather than to the subcoxal rhythm, as during pilocarpine-induced rhythms.

Fifth, there is strict coordination between different legs in walking and rocking and no coordination during searching movements (for a summary, see Bässler, 1983). Coordination comparable to that exhibited by the pilocarpine-induced rhythm (all legs often in phase) only occurs in the intact animal at the beginning of walking prior to the first swing. During this short period, all the legs retract simultaneously (Dean and Wendler, 1984). Several consecutive cycles of in-phase activity of all legs are never observed in intact animals. In animals without a suboesophageal ganglion, in-phase activity of all the legs does not occur even at the beginning of walking.

In summary, except for the anti-phase activity of antagonistic excitatory motoneurones, no feature of the pilocarpine-induced rhythmicity (in the absence of SRPs) appears to correspond to any motor output observed in the intact animal. This is especially noteworthy for rocking, because rocking seems to be mainly generated by a central pattern generator (Pflüger, 1977) and, consequently, the

deafferented thoracic ventral nerve cord is able to generate a rocking-like motor output (Bässler and Wegner, 1983). One could speculate that the relatively fast extensor rhythm in the pilocarpine-stimulated preparation corresponds to rocking, even though its cycle period is significantly longer than in the 'rocking-motor output' of the deafferented thoracic ventral nerve cord, but recordings from extensor nerves on opposite sides showed no regular antiphase coordination as during rocking (O. Dittberner and A. Büschges, unpublished observations). Therefore, the pilocarpine-induced rhythm in stick insects (in the absence of SRPs cannot be termed 'fictive locomotion').

#### *Similarities of SRPs with the motor output during walking*

The observed SRPs bear some similarities to distinct portions of the motor output during walking. (1) The most often observed SRP, SRP1, was characterised by a switch from protractor to retractor activity during a concurrent burst of both depressor motoneurones and by an inhibition of FETi and SETi firing. At first, this seems to resemble the transition from swing to stance of the middle legs in normal forward walking, but there are also some differences. When a middle leg touches the ground at the end of a swing, the existing depressor burst is often briefly interrupted, and a shorter levator burst is apparent. At the same time, the protractor is briefly activated (Cruse, 1976; Godden and Graham, 1984; Graham and Wendler, 1981a). The same is true for the end of searching, when the leg grasps an object (Bässler *et al.* 1991). Touching the ground inhibits extensor and excites flexor motoneurones (Bässler, 1993). There is some probability that the levator and protractor activation is triggered by sense organs (Cruse, 1985; Epstein and Graham, 1983). In the light of these results, one could argue that SRP1 is the centrally generated portion of the switch from swing to stance or the switch from searching to walking (Graham, 1985; Karg *et al.* 1991). (2) SRP2 bears some similarities to the switch from swing to stance in a backward-walking stick insect, although the motor output during backward walking is variable (Graham and Epstein, 1985; Schmitz and Haßfeld, 1989) and often shows co-contraction of antagonistic muscles (Graham and Epstein, 1985). (3) SRP3 was characterised by a switch from retractor to protractor activity in the subcoxal motoneurones during concurrent bursts of both extensor motoneurones, thus resembling the middle leg motor activity at the transition from stance to swing in the forward-walking middle leg (Büschges *et al.* 1994; Epstein and Graham, 1983; Schmitz and Haßfeld, 1989).

Our data show that, in the absence of sensory input and following the application of pilocarpine, a motor output may occur which shows some similarities to the transition between swing and stance or between stance and swing in walking animals. This result is particularly interesting, because previous investigations of walking in virtually intact preparations have shown that the transitions between stance and swing and between swing and stance depend on sensory feedback (Bässler, 1983; Cruse, 1990; Graham, 1985). Our present findings do not contradict these results. In contrast,

they give rise to the hypothesis that the basic structure of the motor output during the transitions from stance to swing and *vice versa* might be to some extent centrally programmed. The role of sensory input is then to trigger and modify the appropriate transition. This hypothesis is supported by the finding that, in intact restrained animals, the SRP most commonly observed in the isolated preparation, i.e. SRP1, was not generated, but seemed to be suppressed, because it occurred with denervation. We are testing this hypothesis by investigating the effects of afferent stimulation on the pharmacologically induced rhythm. If this hypothesis holds, one can call the SRPs 'fictive step-phase transitions'.

#### *Comparison with other systems*

Pharmacologically induced rhythms occur in a number of deafferented locomotory preparations (e.g. cat walking, Grillner and Zangger, 1979, 1984; crayfish walking, Chrachri and Clarac, 1990; lamprey swimming, Wallén and Williams, 1984; locust flight, Stevenson and Kutsch, 1987; locust walking, Ryckebusch and Laurent, 1993; Wolf and Laurent, 1994). In all these systems, the similarities between real motor output and pharmacologically induced rhythms were clear enough for the authors to speak of fictive locomotion. In contrast, the motor output elicited by pharmacological treatment of the stick insect did not resemble the basic features of the motor outputs of continuous forward or backward walking, searching or rocking. This might be due to differences in the neuronal mechanisms activated by pilocarpine in different species. We were, however, able to induce motor patterns that share some similarities with the step-phase transitions during locomotion. On the basis of these results, it is conceivable that the neural networks governing the motor output of the individual leg joints in the walking system of the stick insect are more loosely coupled than they are in the locust or the crayfish, because in the stick insect only the periods of step-phase transition, rather than of an ongoing, stereotyped and tightly coupled rhythm, are exhibited. Perhaps this is because stick insects are slowly climbing animals.

It is noteworthy that pilocarpine induces only fictive locomotion (locust and crayfish) or fictive step-phase transitions (stick insect), i.e. behaviours or parts of behaviours that are thought to be mainly peripherally controlled (e.g. Bässler, 1988, 1993; Cruse, 1990). Behaviours that are known to be mainly centrally generated or centrally organised, such as locust stridulation (Elsner, 1983), locust jumping (Gynther and Pearson, 1986) or stick insect rocking (Pflüger, 1977), are not expressed in the motor output following pilocarpine treatment.

In conclusion, the results of the present paper are consistent with the current understanding of the construction principles of the stick insect walking pattern generator (Bässler, 1993). This generator consists of modules, most of which have sense organs as integral parts. Purely central mechanisms are able to produce an alternating firing of antagonistic motoneurons in each proximal leg joint. Furthermore, we found that pilocarpine induced spontaneous, recurrent patterns (SRPs) of

coupled motoneuronal activity in the motoneurone pools of different leg joints. If further investigations verify that the SRPs are fictive step-phase transitions, another type of central module has to be added. These modules would produce centrally programmed short-lasting coordination between motoneurone pools for different joints, of types appropriate for particular step-phase transitions. These centrally programmed motor patterns may be peripherally triggered under natural circumstances.

We would like to thank Drs S. Gramoll, A. E. Sauer and J. Schmidt for critically reading the manuscript and T. Heller for technical assistance. We thank two anonymous referees for their valuable remarks on the manuscript. This work was supported by DFG grants to A.B. (Bu 857), J.S. (Cr 58/2) and U.B. (Ba 578).

#### References

- ARSHAVSKY, Y. I., ORLOVSKY, G. N., PANCHIN, Y. V., ROBERTS, A. AND SOFFE, S. R. (1993). Neuronal control of swimming locomotion: analysis of the pteropod mollusc *Clione* and embryos of the amphibian *Xenopus*. *Trends Neurosci.* **16**, 227–233.
- BÄSSLER, U. (1983). *Neural Basis of Elementary Behavior in Stick Insects*. Berlin: Springer-Verlag.
- BÄSSLER, U. (1986). On the definition of central pattern generator and its sensory control. *Biol. Cybernetics* **54**, 65–69.
- BÄSSLER, U. (1988). Pattern generation for walking movements. *Trends Biol. Cybernetics* **1**, 295–308.
- BÄSSLER, U. (1993). The walking- (and searching-) pattern generator of stick insects, a modular system composed of reflex chains and endogenous oscillators. *Biol. Cybernetics* **69**, 305–317.
- BÄSSLER, U. AND BÜSCHGES, A. (1990). Interneurons participating in the 'active reaction' in stick insects. *Biol. Cybernetics* **62**, 529–538.
- BÄSSLER, U., FOTH, E. AND BREUTEL, G. (1985). The inherent walking direction differs for the prothoracic and metathoracic legs of stick insects. *J. exp. Biol.* **116**, 301–311.
- BÄSSLER, U. AND NOTHOF, U. (1991). The network producing the 'Active Reaction' of stick insects is a functional element of different pattern generating systems. *Biol. Cybernetics* **62**, 453–462.
- BÄSSLER, U., ROHRBACHER, J., KARG, G. AND BREUTEL, G. (1991). Interruption of searching movements of partly restrained front legs of stick insects, a model situation for the start of stance phase? *Biol. Cybernetics* **65**, 507–514.
- BÄSSLER, U. AND WEGNER, U. (1983). Motor output of the denervated thoracic ventral nerve cord in the stick insect *Carausius morosus*. *J. exp. Biol.* **105**, 127–145.
- BATSCHLET, E. (1965). *Statistical Methods for the Analysis of Problems in Animal Orientation and Certain Biological Rhythms*. American Institute of Biological Sciences, Washington.
- BREER, H. AND SATTELLE, D. B. (1987). Molecular properties and functions of insect acetylcholine receptors. *J. Insect Physiol.* **33**, 771–790.
- BÜSCHGES, A. (1989). Processing of sensory input from the femoral chordotonal organ by spiking interneurons of stick insects. *J. exp. Biol.* **144**, 81–111.
- BÜSCHGES, A. (1990). Nonspiking pathways in a joint-control loop of the stick insect *Carausius morosus*. *J. exp. Biol.* **151**, 133–160.

- BÜSCHGES, A., KITTMANN, R. AND SCHMITZ, J. (1994). Identified nonspiking interneurons in leg reflexes and during walking in the stick insect. *J. comp. Physiol.* **174**, 685–700.
- CALABRESE, R. AND ARBAS, E. A. (1989). Central and peripheral oscillators generating heartbeat in the leech *Hirudo medicinalis*. In *Neuronal and Cellular Oscillators* (ed. J. W. Jacklet), pp. 237–267. New York, Basel: Marcel Dekker.
- CHRACHRI, A. AND CLARAC, F. (1987). Induction of rhythmic activity in motoneurons of crayfish thoracic ganglia by cholinergic agonists. *Neurosci. Lett.* **77**, 49–54.
- CHRACHRI, A. AND CLARAC, F. (1990). Fictive locomotion in the fourth thoracic ganglion of the crayfish, *Procambarus clarkii*. *J. Neurosci.* **10**, 707–719.
- CRUSE, H. (1976). The function of the legs in the free walking stick insect, *Carausius morosus*. *J. comp. Physiol.* **112**, 235–262.
- CRUSE, H. (1985). Which parameters control the leg movement of a walking leg? II. The start of swing phase. *J. exp. Biol.* **116**, 357–362.
- CRUSE, H. (1990). What mechanisms coordinate leg movement in walking arthropods? *Trends Neurosci.* **13**, 15–21.
- CRUSE, H., SCHMITZ, J., BRAUN, U. AND SCHWEINS, A. (1993). Control of body height in a stick insect walking on a treadmill. *J. exp. Biol.* **181**, 141–155.
- DAVIS, J. P. AND PITMAN, R. M. (1991). Characterization of receptors mediating the actions of dopamine on an identified inhibitory motoneurone of the cockroach. *J. exp. Biol.* **155**, 203–217.
- DEAN, J. (1991). Effect of load on leg movement and step coordination of the stick insect *Carausius morosus*. *J. exp. Biol.* **159**, 449–471.
- DEAN, J. AND WENDLER, G. (1983). Stick insect locomotion on a walking wheel: interleg coordination of leg position. *J. exp. Biol.* **103**, 75–94.
- DEAN, J. AND WENDLER, G. (1984). Stick insect locomotion on a wheel: patterns of stopping and starting. *J. exp. Biol.* **110**, 203–216.
- DEBRODT, B. AND BÄSSLER, U. (1989). Recording from visible neurone somata in the desheathed metathoracic ganglion of the phasmid *Extatosoma tiaratum*. *Zool. Jb. Physiol.* **93**, 495–500.
- DELCOMYN, F. (1980). Neural basis of rhythmic behavior in animals. *Science* **210**, 492–498.
- DICKINSON, P. AND MOULINS, M. (1992). Interactions and combinations between different networks in the stomatogastric nervous system. In *Dynamic Biological Networks* (ed. R. M. Harris-Warrick, E. Marder, A. I. Selverston and M. Moulins), pp. 139–160. Cambridge, MA, London, England: MIT Press.
- ELSNER, N. (1983). Insect stridulation and its neurophysiological basis. In *Bioacoustics – A Comparative Approach* (ed. D. B. Lewis), pp. 69–92. London: Academic Press.
- ELSON, R. AND SELVERSTON, A. I. (1992). Mechanisms of gastric rhythm generation in the isolated stomatogastric ganglion of spiny lobsters: bursting pacemaker potentials, synaptic interactions and muscarinic modulation. *J. Neurophysiol.* **68**, 890–907.
- EPSTEIN, S. AND GRAHAM, D. (1983). Behaviour and motor output for an insect walking on a slippery surface. I. Forward walking. *J. exp. Biol.* **105**, 215–229.
- FOTH, E. AND BÄSSLER, U. (1985). Leg movements of stick insects walking with five legs on a treadmill and with one leg on a motor driven belt. II. Leg coordination when step-frequencies differ from leg to leg. *Biol. Cybernetics* **51**, 319–324.
- FOTH, E. AND GRAHAM, D. (1983a). Influence of loading parallel to the body axis on the walking coordination of an insect. I. Ipsilateral changes. *Biol. Cybernetics* **47**, 17–23.
- FOTH, E. AND GRAHAM, D. (1983b). Influence of loading parallel to the body axis on the walking coordination of an insect. II. Contralateral changes. *Biol. Cybernetics* **48**, 149–157.
- GETTING, P. A. (1989). Emerging principles governing the operation of neural networks. *A. Rev. Neurosci.* **12**, 185–204.
- GODDEN, D. H. AND GRAHAM, D. (1984). A preparation of the stick insect *Carausius morosus* for recording intracellularly from identified neurones during walking. *Physiol. Ent.* **9**, 275–286.
- GRAHAM, D. (1972). A behavioral analysis of the temporal organisation of walking movements in the 1st instar and adult stick insect (*Carausius morosus*). *J. comp. Physiol. A* **81**, 23–52.
- GRAHAM, D. (1979). Effects of circum-oesophageal lesion on the behaviour of the stick insect *Carausius morosus*. I. Cyclic behavior patterns. *Biol. Cybernetics* **32**, 139–145.
- GRAHAM, D. (1985). Pattern and control of walking in insects. *Adv. Insect Physiol.* **18**, 31–140.
- GRAHAM, D. AND BÄSSLER, U. (1981). Effects of afference sign reversal on motor activity in walking insects (*Carausius morosus*). *J. exp. Biol.* **91**, 179–193.
- GRAHAM, D. AND EPSTEIN, S. (1985). Behaviour and motor output for an insect walking on a slippery surface. II. Backward walking. *J. exp. Biol.* **118**, 287–296.
- GRAHAM, D. AND WENDLER, G. (1981a). Motor output to the protractor and retractor coxae muscles in stick insects walking on a treadmill. *Physiol. Ent.* **6**, 161–174.
- GRAHAM, D. AND WENDLER, G. (1981b). The reflex behaviour and innervation of the tergo-coxal retractor muscles of the stick insect *Carausius morosus*. *J. comp. Physiol.* **143**, 81–91.
- GRILLNER, S. (1985). Neurobiological bases of rhythmic motor acts in vertebrates. *Science* **228**, 143–149.
- GRILLNER, S. AND ZANGGER, P. (1979). On the central generation of locomotion in the low spinal cat. *Expl Brain Res.* **34**, 241–261.
- GRILLNER, S. AND ZANGGER, P. (1984). The effects of dorsal root transection on the efferent motor pattern in the cat's hindlimb during locomotion. *Acta physiol. scand.* **120**, 393–405.
- GYNTHNER, I. AND PEARSON, K. G. (1986). Intracellular recordings from interneurons and motoneurons during bilateral kicks in the locust: implications for mechanisms controlling the jump. *J. exp. Biol.* **122**, 323–343.
- HARRIS-WARRICK, R. M., MARDER, E., SELVERSTON, A. I. AND MOULINS, M. (1992). (eds) *Dynamic Biological Networks*. Cambridge, MA, London, England: MIT Press.
- IKEDA, K. AND WIERSMA, C. A. G. (1964). Autogenic rhythmicity in the abdominal ganglia of the crayfish: the control of swimmeret movements. *Comp. Biochem. Physiol.* **12**, 107–115.
- KARG, G., BREUTEL, G. AND BÄSSLER, U. (1991). Sensory influences on the coordination of two leg joints during searching movements of stick insects. *Biol. Cybernetics* **64**, 329–335.
- KRISTAN, W. B. AND WEEKS, J. C. (1983). Neurons controlling the initiation, generation and modulation of leech swimming. In *Neural Origin of Rhythmic Movements* (ed. A. Roberts and B. Roberts). *Soc. exp. Biol. Symp.* **37**, 243–260.
- LEITCH, B., WATKINS, B. L. AND BURROWS, M. (1993). Distribution of acetylcholine receptors in the central nervous system of adult locusts. *J. comp. Neurol.* **334**, 47–58.
- MARQUARDT, F. (1940). Beiträge zur Anatomie der Muskulatur und der peripheren Nerven von *Carausius (Dixippus) morosus*. *Zool. Jb. Anat. ont. Tiere* **66**, 63–128.
- PEARSON, K. G. (1985). Are there central pattern generators for walking and flight in insects? In *Feedback and Motor Control in Invertebrates and Vertebrates* (ed. W. J. P. Barnes and M. H. Gladden), pp. 307–315. London: Croom Helm Ltd.

- PEARSON, K. G. (1987). Central pattern generation: a concept under scrutiny. In *Advances in Physiological Research* (ed. H. McLennan, J. R. Ledsome, C. H. S. McIntosh and D. R. Jones), pp. 167–185. New York: Plenum Press.
- PEARSON, K. G. AND RAMIREZ, J.-M. (1992). Parallels with other invertebrate and vertebrate motor systems. In *Dynamic Biological Networks* (ed. R. M. Harris-Warrick, E. Marder, A. I. Selverston and M. Moulins), pp. 263–282. Cambridge, MA, London, England: MIT Press.
- PEARSON, K. G., STEIN, R. B. AND MALHOTRA, S. K. (1970). Properties of action potentials from insect motor nerve fibres. *J. exp. Biol.* **53**, 299–316.
- PFLÜGER, H.-J. (1977). The control of rocking movements of the phasid *Carausius morosus* Br. *J. comp. Physiol.* **120**, 181–202.
- ROBERTSON, R. M. AND PEARSON, K. G. (1985). Neural circuits in the flight system of the locust. *J. Neurophysiol.* **53**, 110–128.
- RYCKEBUSCH, S. AND LAURENT, G. (1993). Rhythmic patterns evoked in locust leg motor neurons by the muscarinic agonist pilocarpine. *J. Neurophysiol.* **69**, 1583–1595.
- SCHMITZ, J. (1986). The depressor trochanteris motoneurons and their role in the coxa–trochanter feedback loop in the stick insect *Carausius morosus*. *Biol. Cybernetics* **55**, 25–34.
- SCHMITZ, J. (1993). Load compensating reactions in the proximal leg joints of stick insects during standing and walking. *J. exp. Biol.* **183**, 15–33.
- SCHMITZ, J., BÜSCHGES, A. AND DELCOMYN, F. (1988). An improved electrode design for *en passant* recordings from small nerves. *Comp. Biochem. Physiol.* **91A**, 769–772.
- SCHMITZ, J., BÜSCHGES, A. AND KITTMANN, R. (1991). Intracellular recordings from nonspiking interneurons in a semi-intact, tethered walking insect. *J. Neurobiol.* **22**, 907–921.
- SCHMITZ, J. AND HABFELD, G. (1989). The treading-on-tarsus reflex in stick insects: phase-dependence and modifications of the motor output during walking. *J. exp. Biol.* **143**, 373–388.
- SELVERSTON, A. I. AND MOULINS, M. (1987). (eds) *The Crustacean Stomatogastric Ganglion*. Heidelberg: Springer-Verlag.
- SELVERSTON, A. I., RUSSELL, D. F. AND MILLER, J. P. (1976). The stomatogastric nervous system: structure and function of a small neural network. *Prog. Neurobiol.* **7**, 215–290.
- SHERRINGTON, C. S. (1913). Nervous rhythm arising from rivalry of antagonistic reflexes: Reflex stepping as outcome of double reciprocal innervation. *Proc. R. Soc. Lond.* **86**, 233–261.
- STEVENSON, P. A. AND KUTSCH, W. (1987). A reconsideration of the central pattern generator concept for locust flight. *J. comp. Physiol.* **A 161**, 115–129.
- STORRER, J., BÄSSLER, U. AND MAYER, S. (1986). Motor neurons in the meso- and metathoracic ganglia of the stick insect, *Carausius morosus*. *Zool. Jb. Physiol.* **90**, 359–374.
- THOMPSON, W. J. AND STENT, G. S. (1976). Neuronal control of heartbeat in the medical leech. I. Generation of the vascular constriction rhythm by heart motor neurons. *J. comp. Physiol.* **111**, 261–279.
- TRIMMER, B. A. AND WEEKS, J. C. (1991). The mechanisms of an excitability change induced by muscarinic receptors in an identified insect motoneuron. *Soc. Neurosci. Abstr.* **17**, 199.
- VON HOLST, E. (1936). Über den ‘Magnet-Effekt’ als koordinierendes Prinzip im Rückenmark. *Pflügers Arch. ges. Physiol.* **241**, 655–682.
- VON HOLST, E. (1939). Die relative Koordination als Phänomen und als Methode zentralnervöser Funktionsanalyse. *Ergebn. Physiol.* **42**, 228–302.
- WALLÉN, P. AND WILLIAMS, T. L. (1984). Fictive locomotion in the lamprey spinal cord *in vitro* compared with swimming in the intact and spinal animal. *J. Physiol., Lond.* **347**, 225–239.
- WEIDLER, D. J. AND DIECKE, F. P. J. (1969). The role of cations conduction in the central nervous system of the herbivorous insect *Carausius morosus*. *Z. vergl. Physiol.* **64**, 372–399.
- WENDLER, G. (1964). Laufen und Stehen der Stabheuschrecke *Carausius morosus*: Sinnesborstenfelder in den Beingelenken als Glieder von Regelkreisen. *Z. vergl. Physiol.* **48**, 198–250.
- WILSON, D. M. (1961). The central nervous control of flight in a locust. *J. exp. Biol.* **38**, 471–490.
- WOLF, H. AND LAURENT, G. (1994). Rhythmic modulation of the responsiveness of locust sensory local interneurons by walking pattern generating networks. *J. Neurophysiol.* **71**, 110–118.
